# Supplementary material
Source: PubMed Central journal article supplement (PMC8257406)
Supplement: mmc1.pdf [file mmc1.pdf]

**Drug Repurposing against SARS-CoV-2 Receptor Binding Domain using Ensemble-based Virtual Screening and Molecular Dynamics Simulations**

**Supplementary Information**

**Table S1:** List of FDA approved drugs which are common in both top 50 XP-based and MM-GBSA-based shortlisted drugs. Receptor ID 1, 2 and 3 corresponds to the MD generated conformations of RBD. Receptor ID 4 is crystal conformation.

| Sr. No | Generic name    | Drug bank ID | XP score | MM-GBSA Score | Best Receptor ID    | Description                                                                                                           |
|--------|-----------------|--------------|----------|---------------|---------------------|-----------------------------------------------------------------------------------------------------------------------|
| 1      | Acarbose        | DB00284      | -11.53   | -34.11        | 2 (XP), 3 (MM-GBSA) | Anti-Diabetic                                                                                                         |
| 2      | FAD             | DB03147      | -10.69   | -54.31        | 1                   | Dietary supplement                                                                                                    |
| 3      | Rutin           | DB01698      | -10.30   | -52.51        | 2                   | Dietary supplement                                                                                                    |
| 4      | Gonadorelin     | DB00644      | -9.43    | -53.12        | 1 (XP), 2 (MM-GBSA) | Synthetic female hormone                                                                                              |
| 5      | Hesperidin      | DB04703      | -8.85    | -59.65        | 1                   | Antioxidant                                                                                                           |
| 6      | Lactitol        | DB12492      | -8.53    | -50.49        | 1                   | Sweetener and laxative. Used for the treatment of constipation                                                        |
| 7      | Diosmin         | DB08995      | -8.23    | -47.06        | 2                   | Antioxidant. Used for the treatment of hemorrhoids and leg sores                                                      |
| 8      | Hyaluronic acid | DB08818      | -10.55   | -40.99        | 2                   | Anionic, nonsulfated glycosaminoglycan used to treat knee pain and reduce wrinkles on face during plastic surgery     |
| 9      | Nystatin        | DB00646      | -9.49    | -55.99        | 1                   | A polyene antifungal drug that has broad-spectrum fungicidal and fungistatic activity. Used to treat oral candidiasis |

|    |                       |         |       |        |   |                                                                                                                                                    |
|----|-----------------------|---------|-------|--------|---|----------------------------------------------------------------------------------------------------------------------------------------------------|
| 10 | NADH                  | DB00157 | -9.34 | -43.17 | 4 | Coenzyme. Dietary supplement                                                                                                                       |
| 11 | Framycetin            | DB00452 | -9.24 | -33.48 | 3 | Antibiotic. For the treatment of bacterial blepharitis, bacterial conjunctivitis, corneal injuries, corneal ulcers and meibomianitis.              |
| 12 | Fondaparinux          | DB00569 | -8.54 | -32.06 | 3 | Fondaparinux (Arixtra) is a synthetic anticoagulant agent.                                                                                         |
| 13 | Vidarabine            | DB00194 | -8.33 | -31.30 | 1 | A nucleoside antibiotic isolated from <i>Streptomyces antibioticus</i> . For treatment of chickenpox - varicella, herpes zoster and herpes simplex |
| 14 | Pralatrexate          | DB06813 | -8.02 | -37.99 | 1 | Pralatrexate is an antimetabolite for the treatment of relapsed or refractory peripheral T-cell lymphoma.                                          |
| 15 | Gemcitabine           | DB00441 | -7.94 | -32.90 | 1 | Gemcitabine is a nucleoside analog used as chemotherapy.                                                                                           |
| 16 | Sucrose               | DB02772 | -7.61 | -31.83 | 2 | A nonreducing disaccharide composed of glucose and fructose linked via their anomeric carbons.                                                     |
| 17 | Glutathione Disulfide | DB03310 | -7.51 | -36.47 | 4 | Glutathione is an antioxidant. After oxidation of GSH, glutathione disulfide forms.                                                                |
| 18 | Atrovastatin          | DB01076 | -7.36 | -39.16 | 2 | Atrovastatin (Lipitor®), is a lipid-lowering drug included in the statin class of medications.                                                     |

**Table S2: Known Side effects of repurposed drugs from the literature.**

| Drug Name       | Drug bank ID | Major side effects                                                                                       | Reference |
|-----------------|--------------|----------------------------------------------------------------------------------------------------------|-----------|
| Gonadorelin     | DB00644      | Difficulty in breathing, flushing (continuing) and rapid heartbeat                                       | 1         |
| Fondaparinux    | DB00569      | Pale skin, troubled breathing with exertion, unusual bleeding or bruising, unusual tiredness or weakness | 2         |
| Atrovastatin    | DB01076      | Type 2 diabetes mellitus, myopathy, persistent liver enzyme abnormalities                                | 3         |
| FAD             | DB03147      | No adverse effects                                                                                       | 4         |
| Hyaluronic acid | DB08818      | Allergic reactions                                                                                       | 5         |
| Pralatrexate    | DB06813      | Abdominal pain, backpain, bloody nose, itching skin, rash and loss of strength                           | 6         |

1. <https://www.mskcc.org/cancer-care/patient-education/gonadorelin>
2. <https://www.mskcc.org/cancer-care/patient-education/fondaparinux>
3. <https://www.mskcc.org/cancer-care/patient-education/atorvastatin>
4. <https://pi.oregonstate.edu/mic/vitamins/riboflavin>
5. <https://www.mskcc.org/cancer-care/patient-education/hyaluronate-and-derivatives>
6. <https://www.mskcc.org/cancer-care/patient-education/pralatrexate>

DB08995

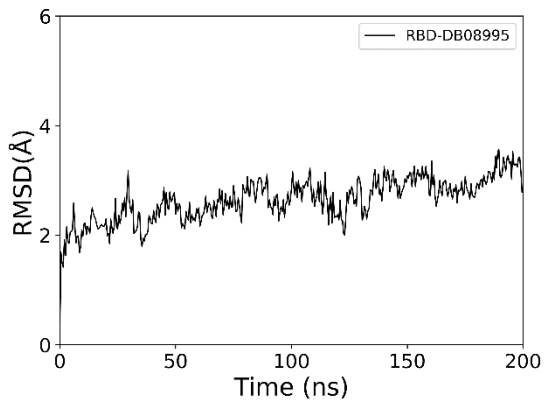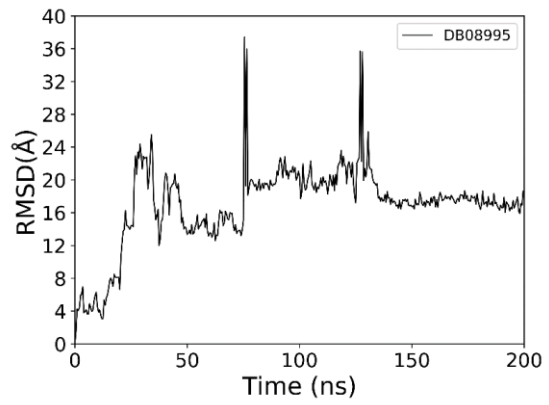

DB00284\_MMGBSA

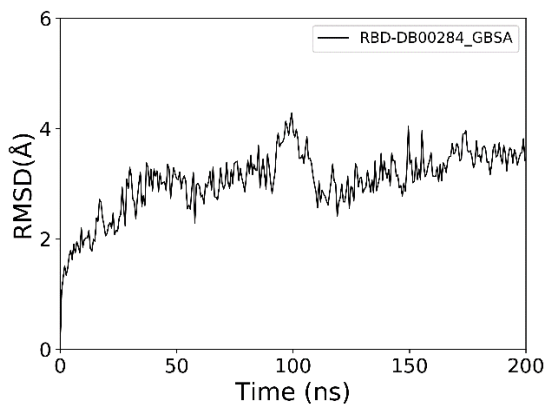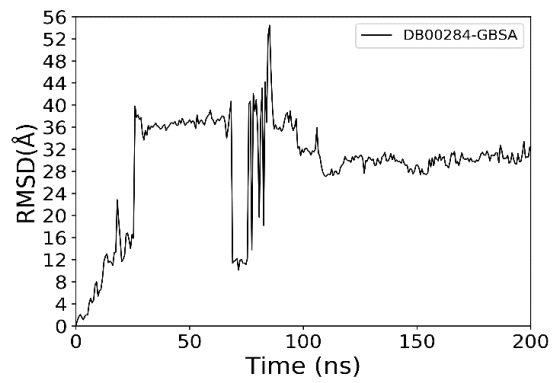

DB00284\_XP

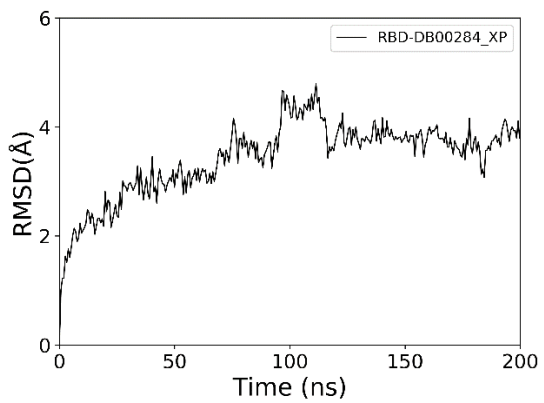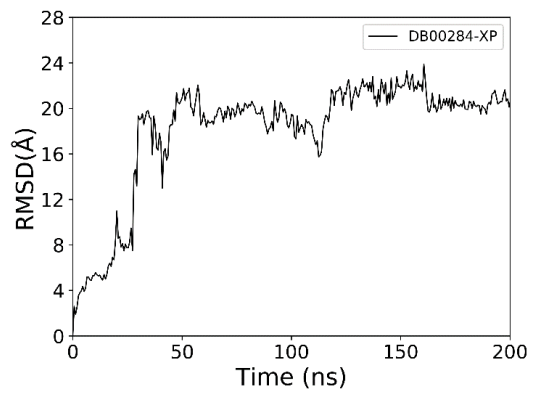

DB00644\_MMGBSA

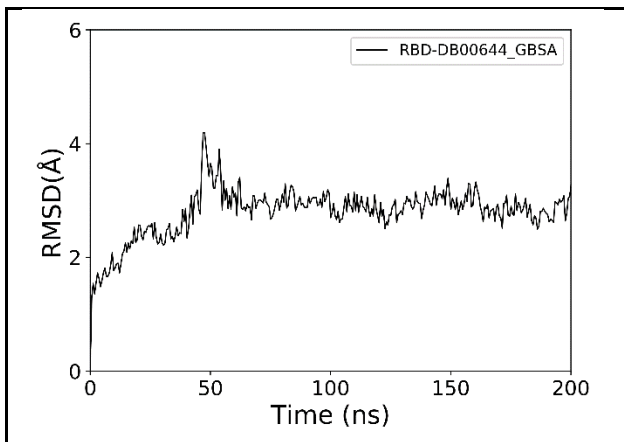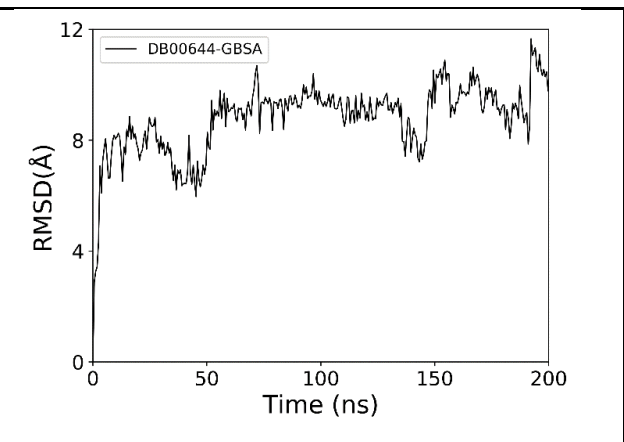

DB00644\_XP

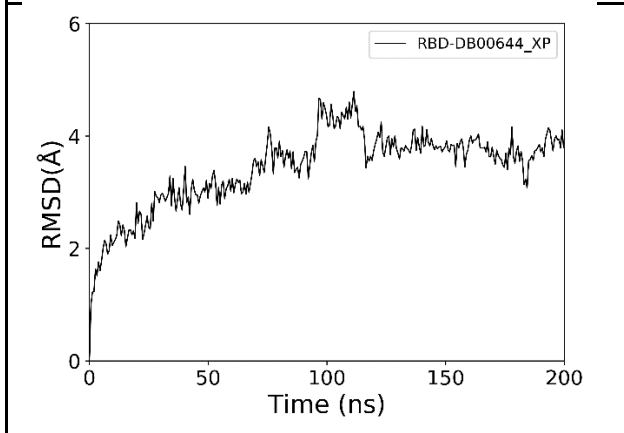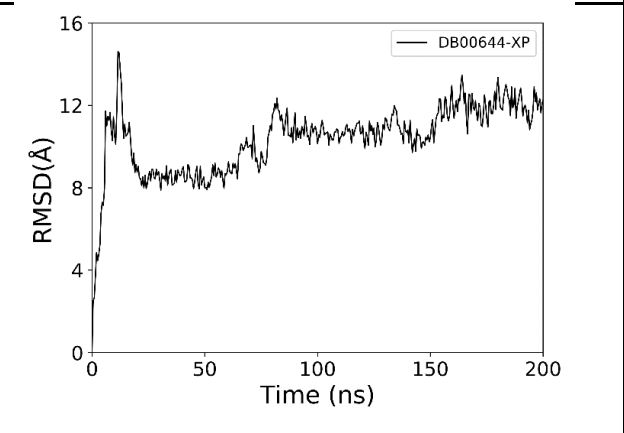

DB01698

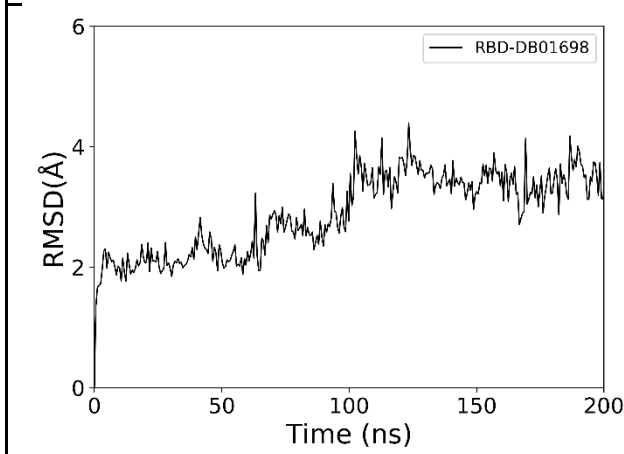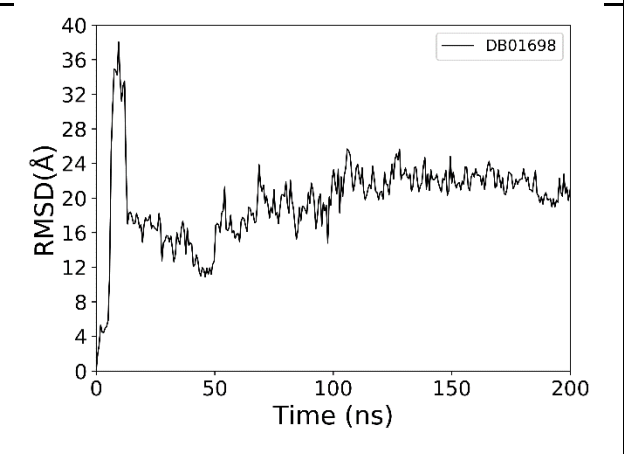

DB03147

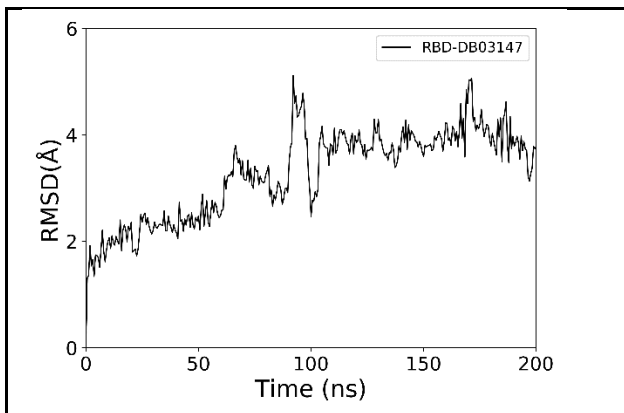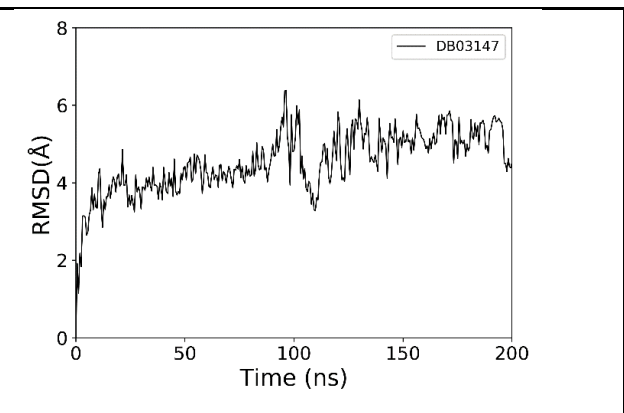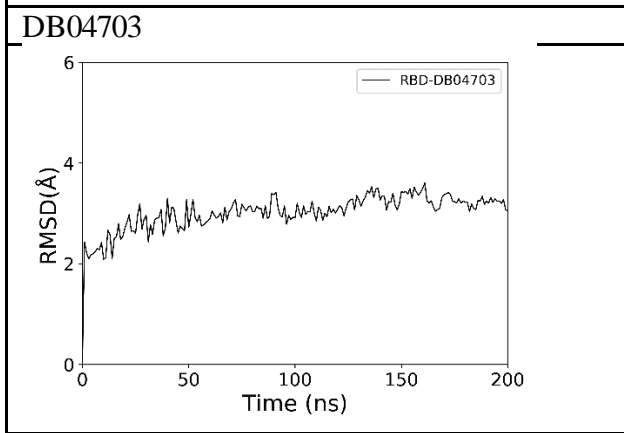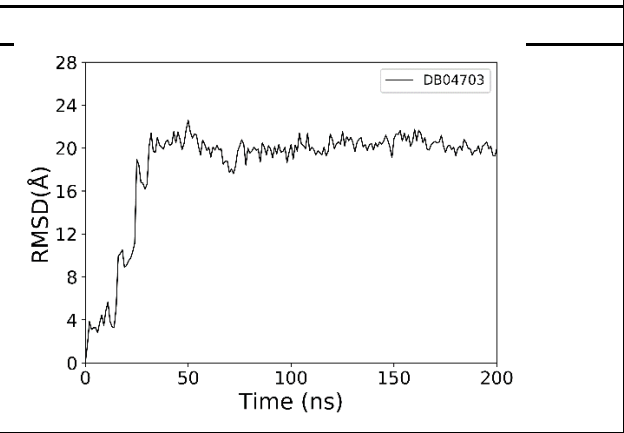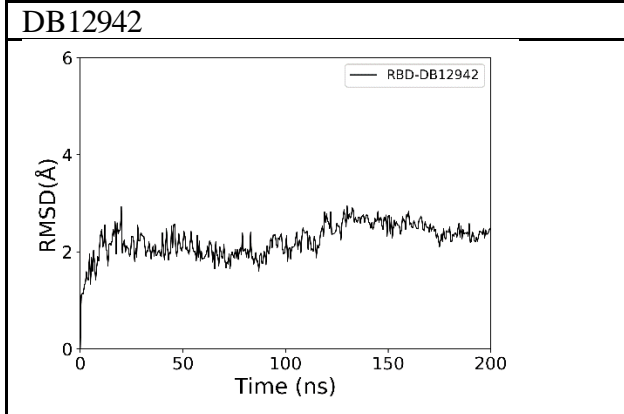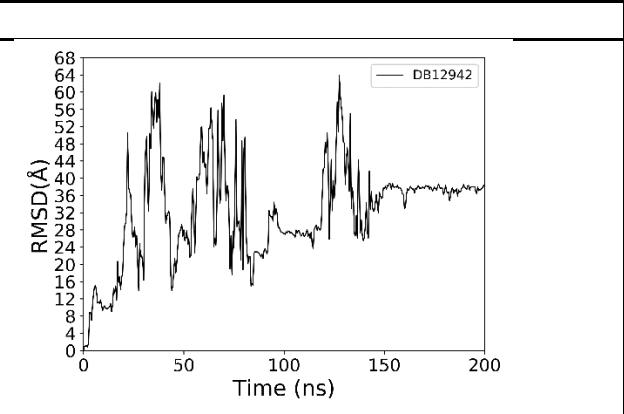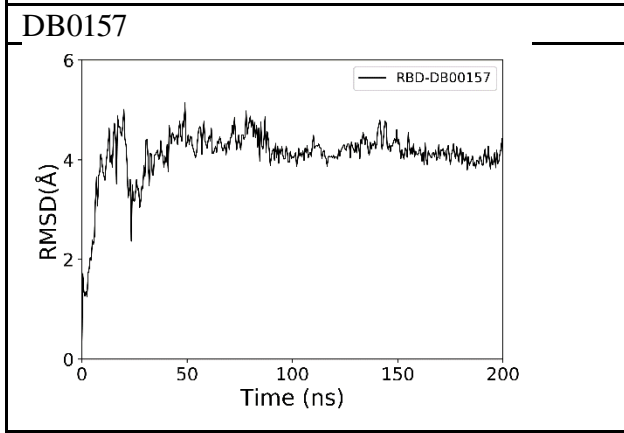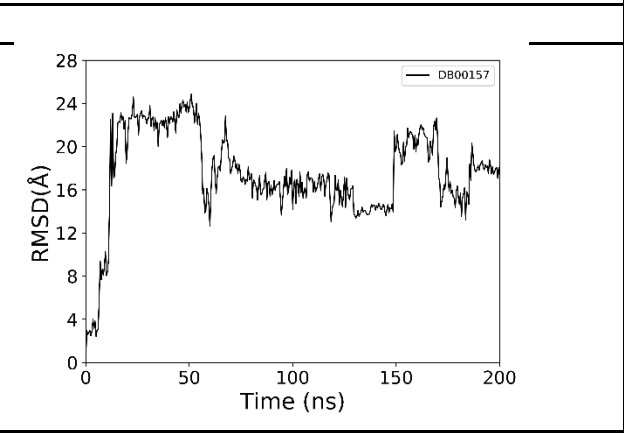

DB0441

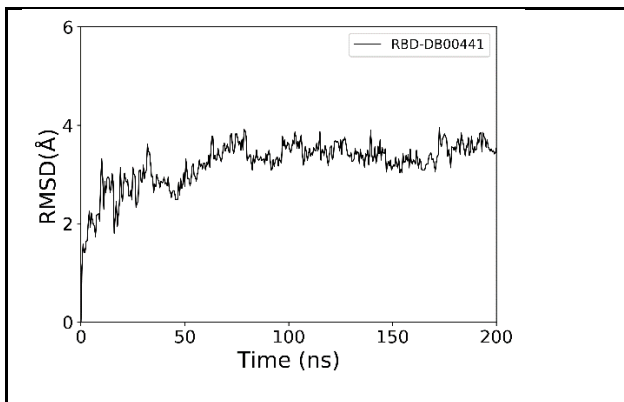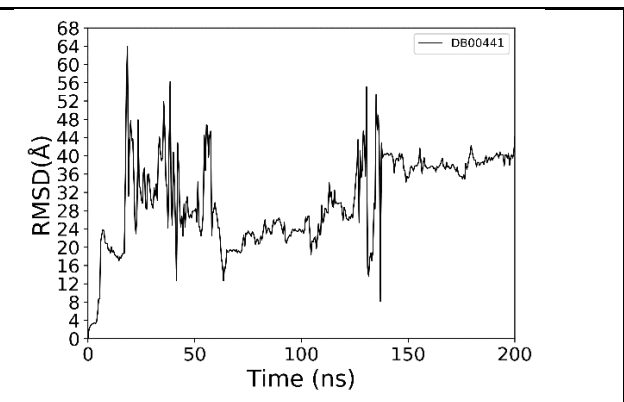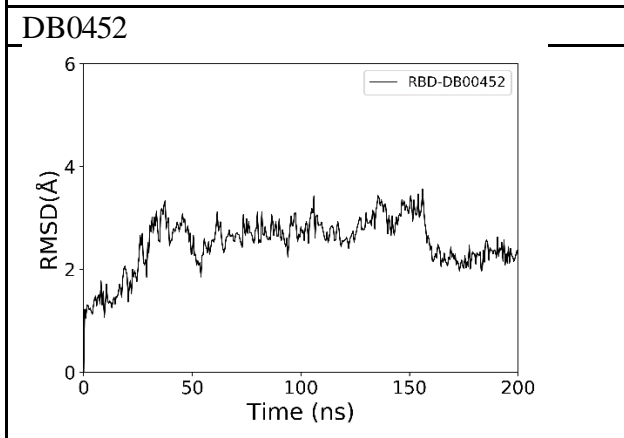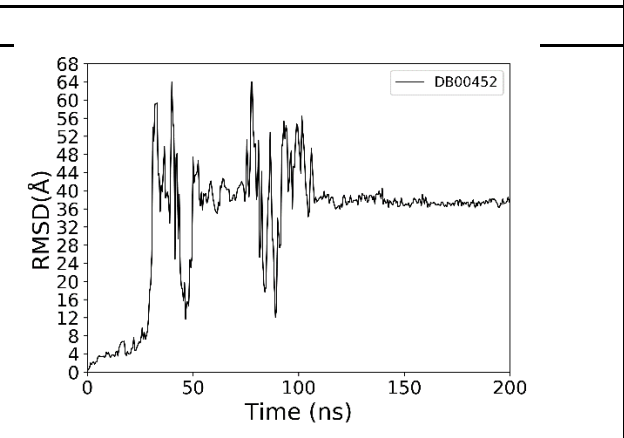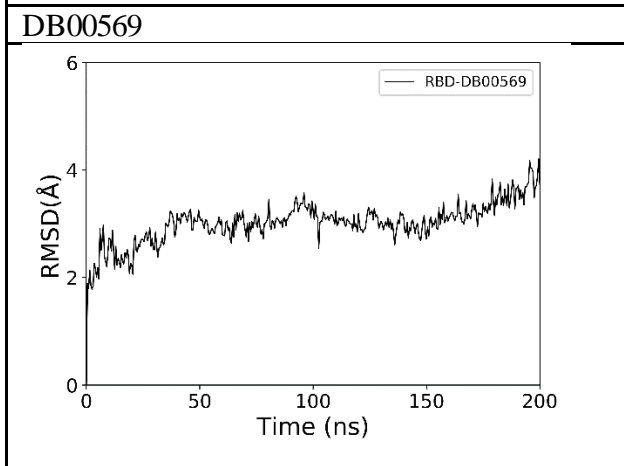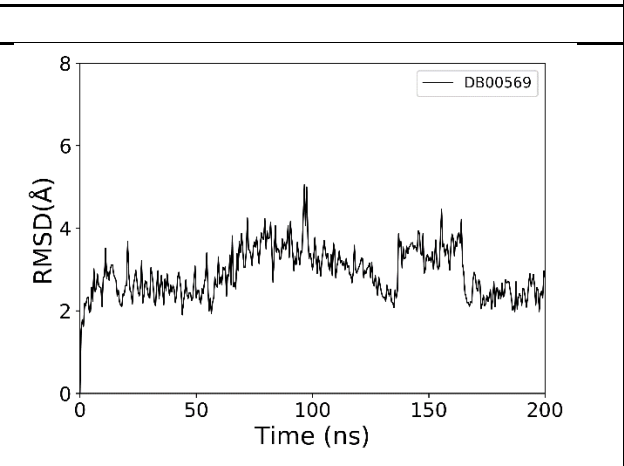

DB00646

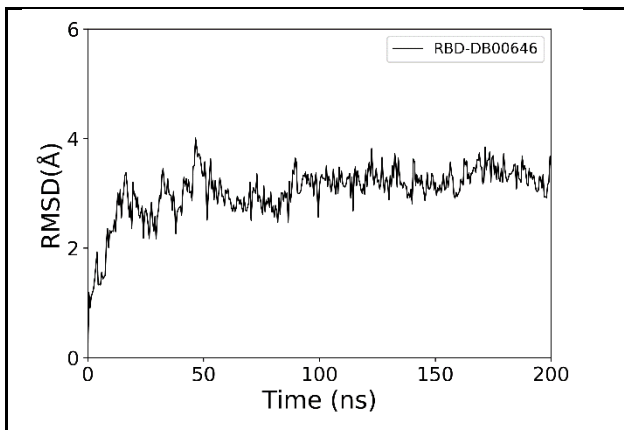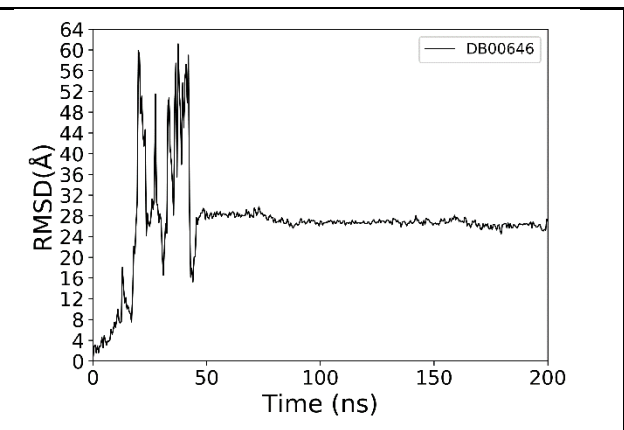

DB00895

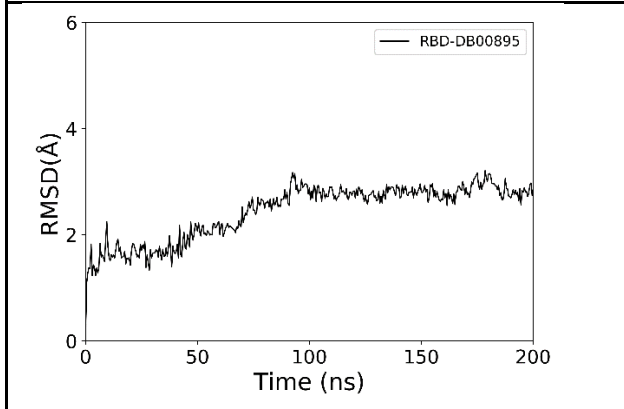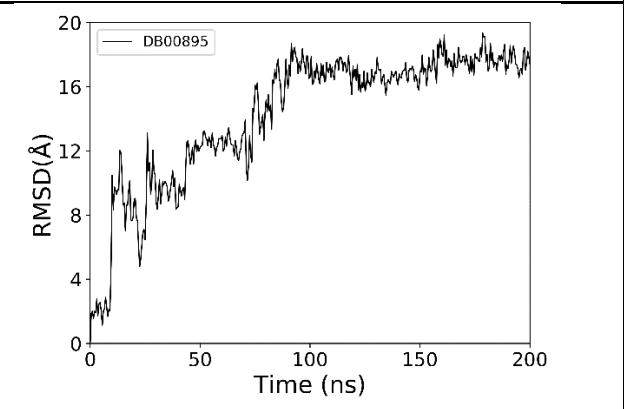

DB01076

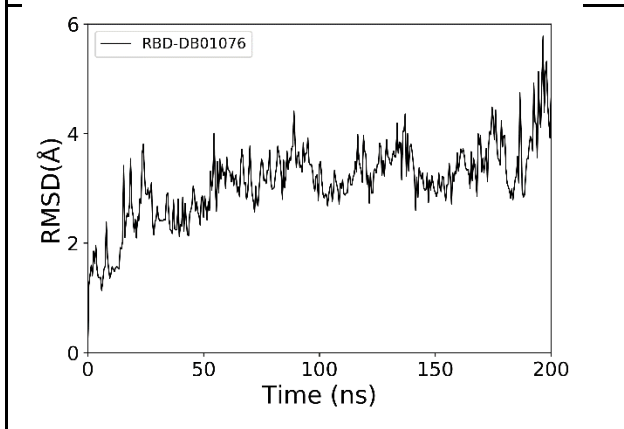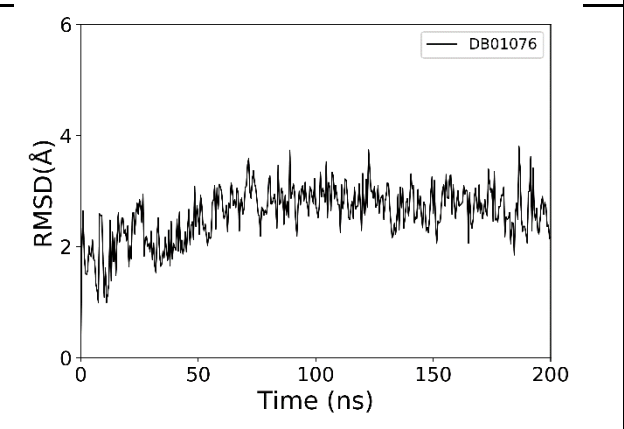

DB02772



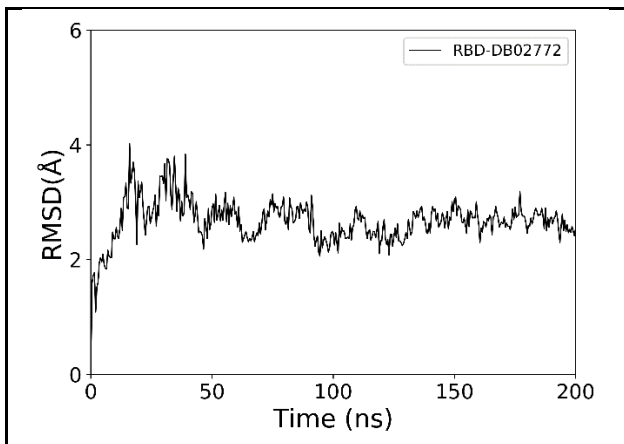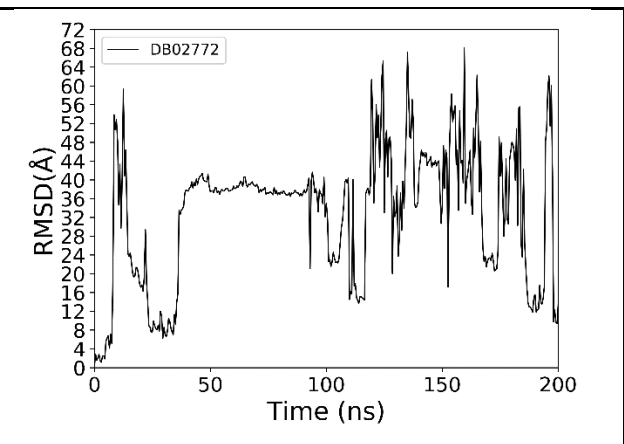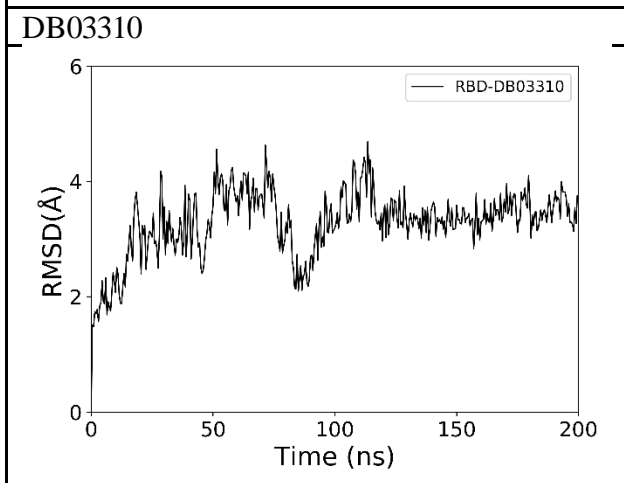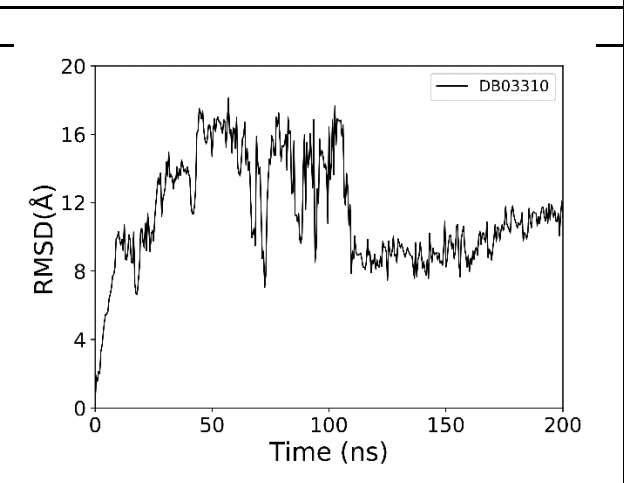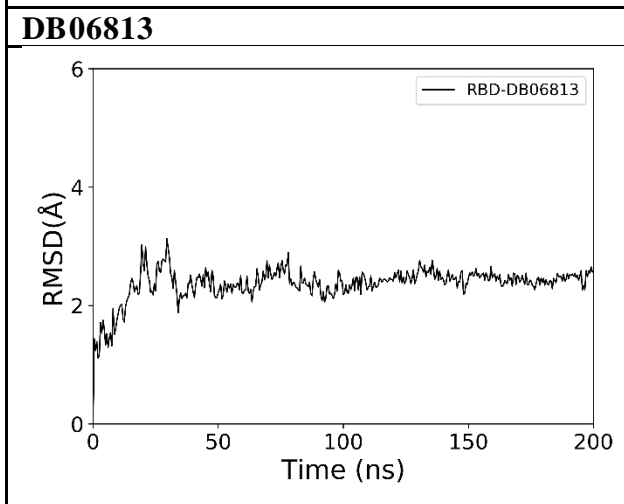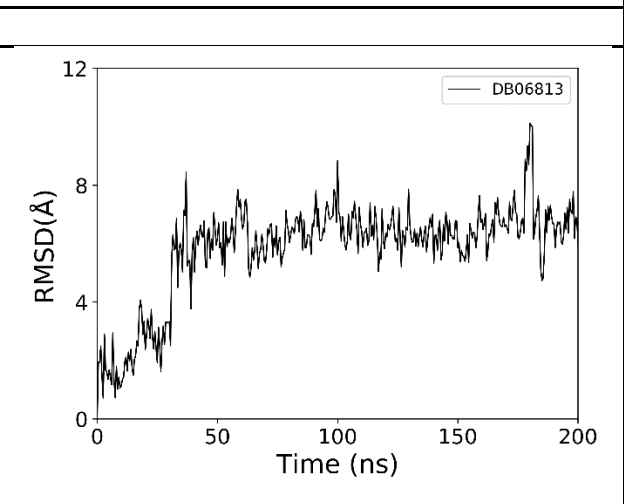

**DB08818**

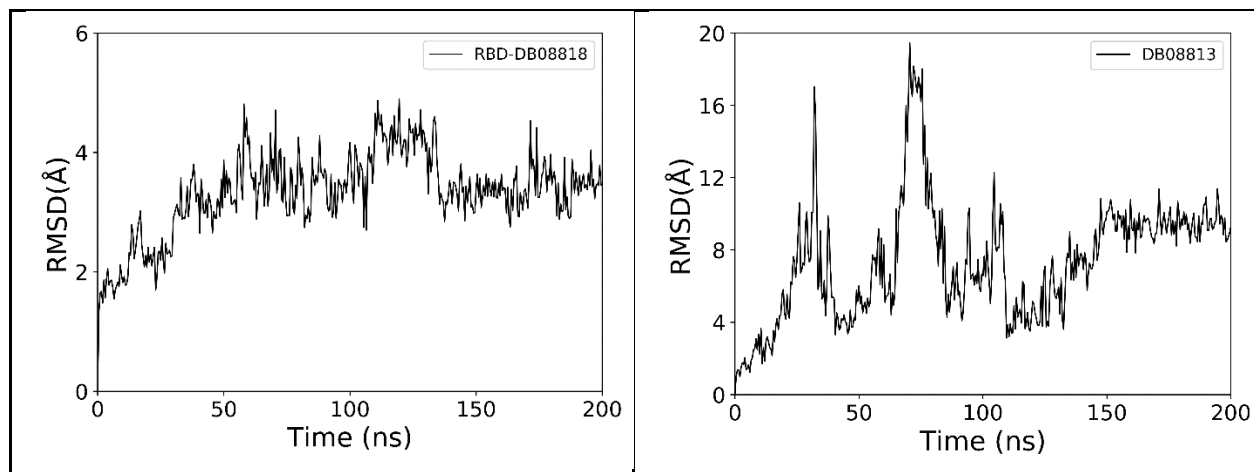

**Figure S1:** RMSD plots of SARS-CoV-2 RBD (left column) and drugs (right column) in 21 RBD-Drug complexes.

### DB08995

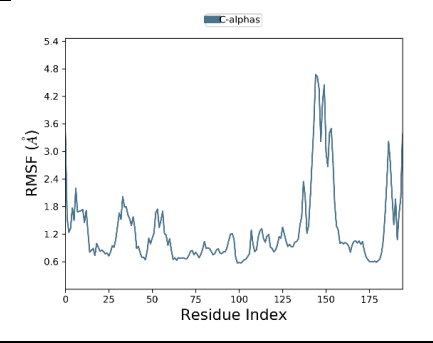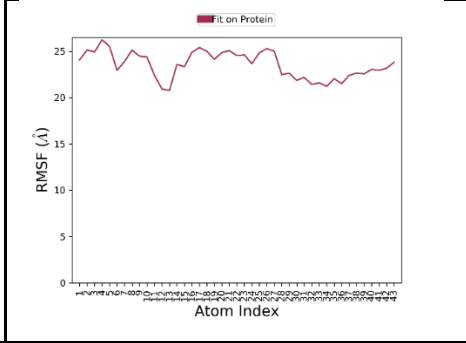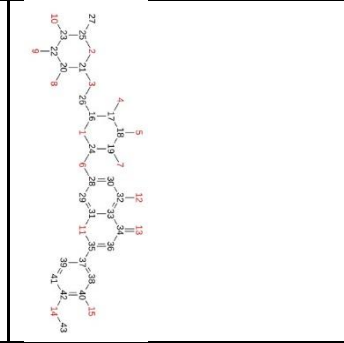

### DB00284\_MMGBSA

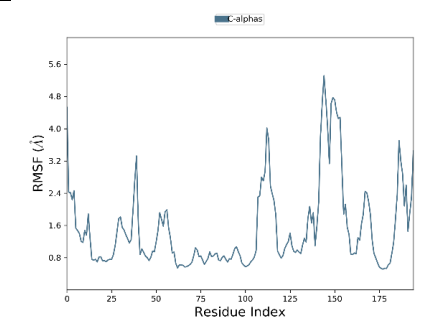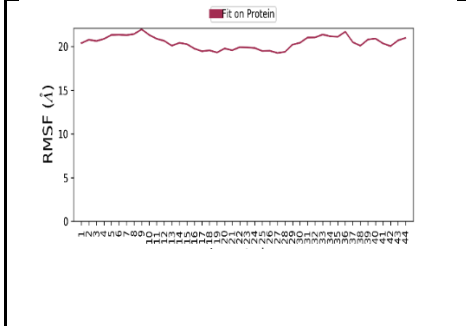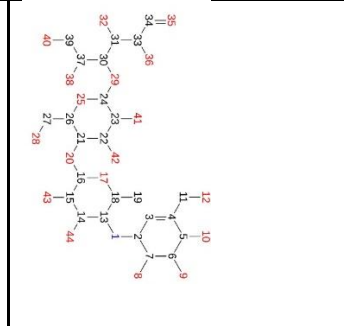

### DB00284\_XP

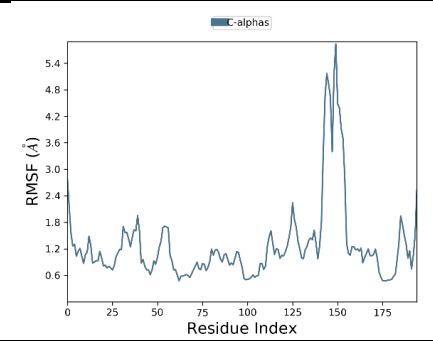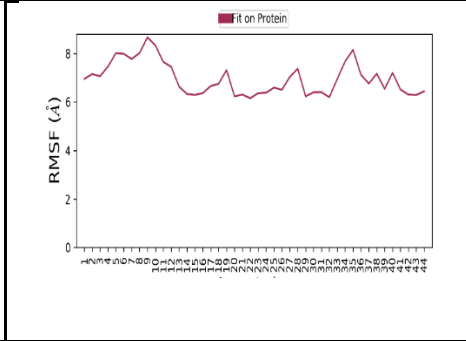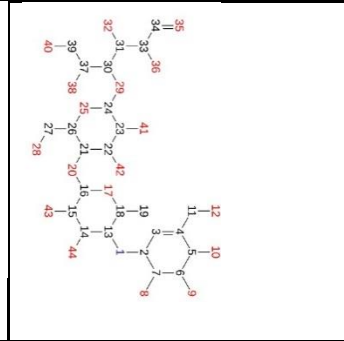

### DB00644\_MMGBSA

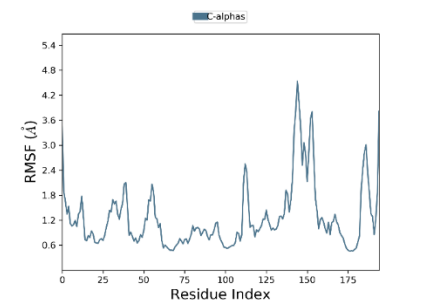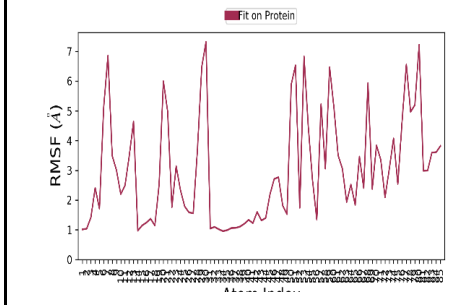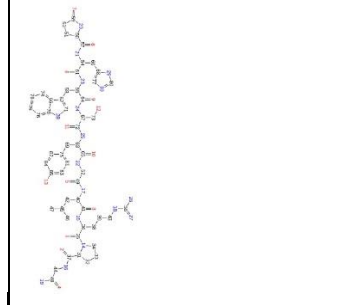

### DB00644\_XP

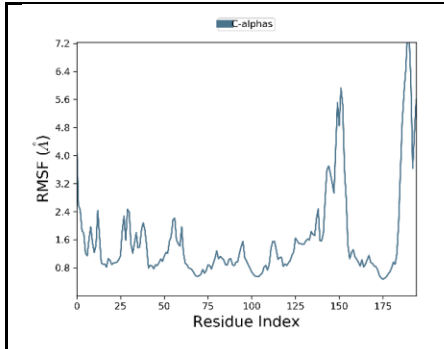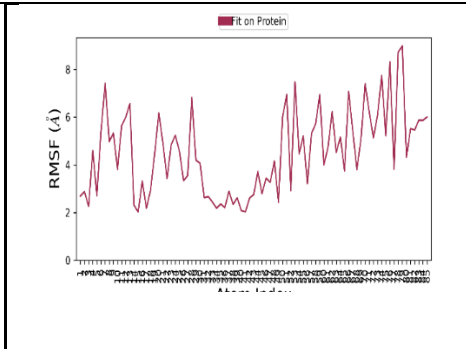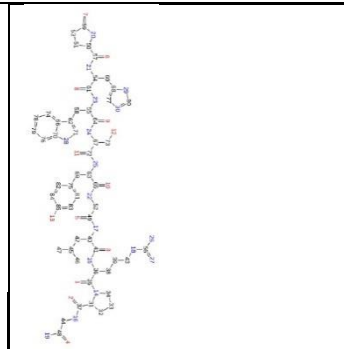

DB01698

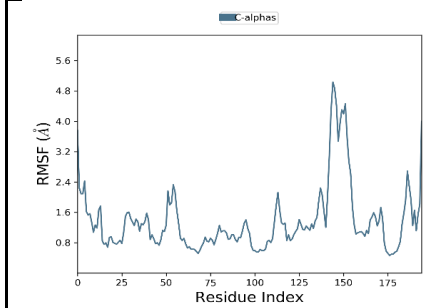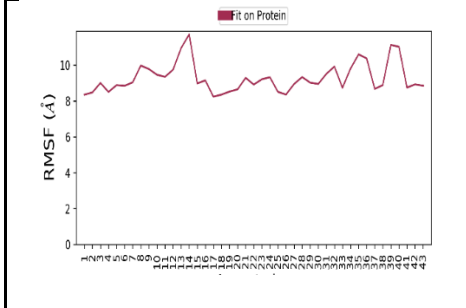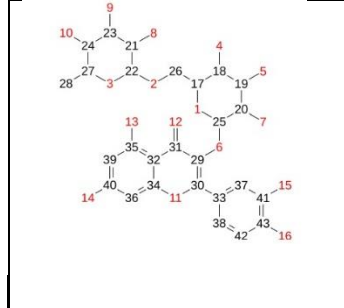

DB03147

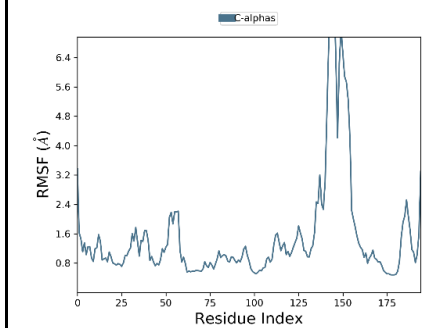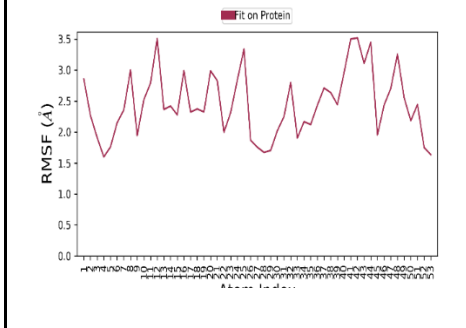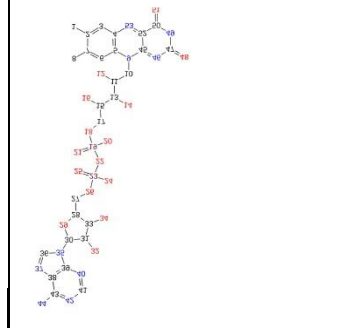

DB04703

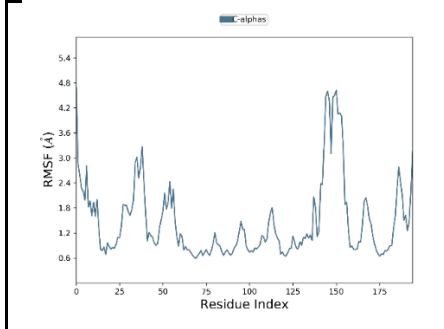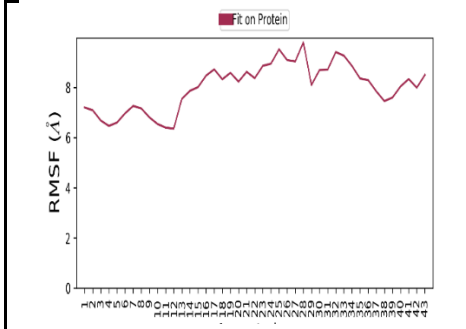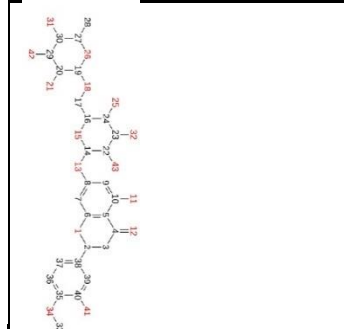

DB12942

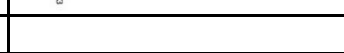

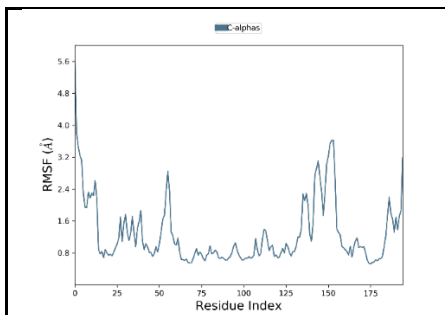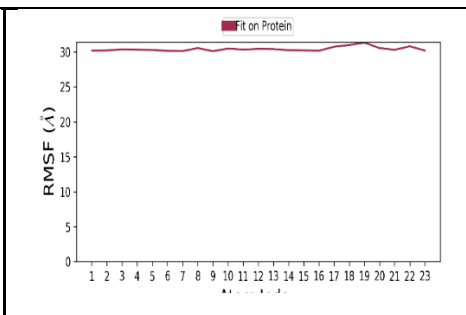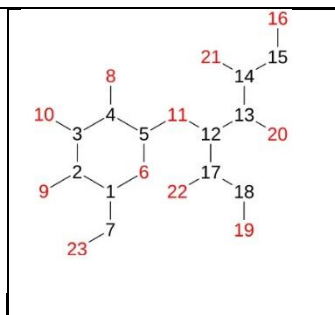

DB0157

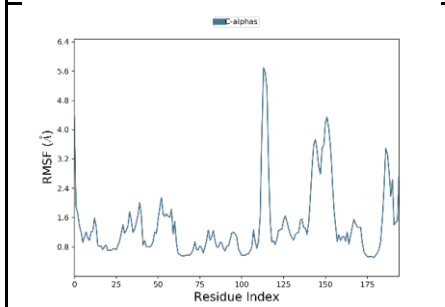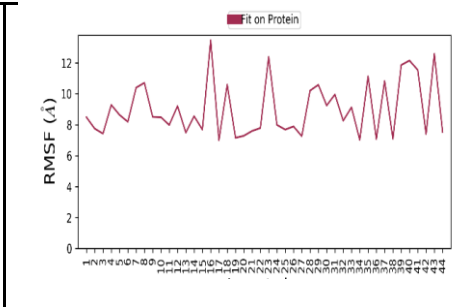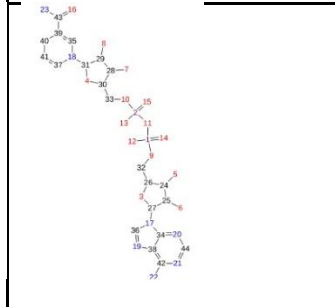

DB0441

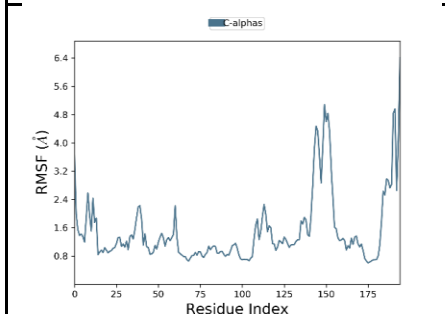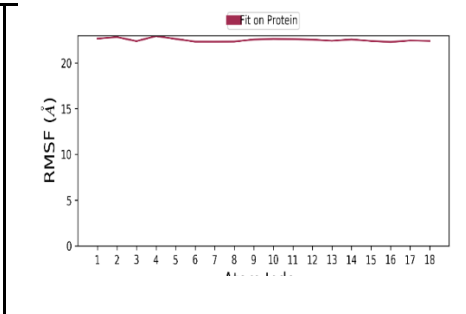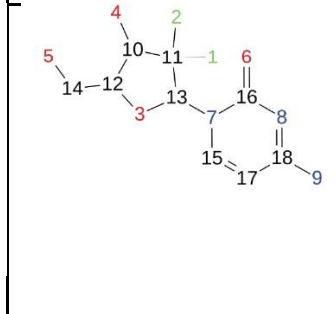

DB0452

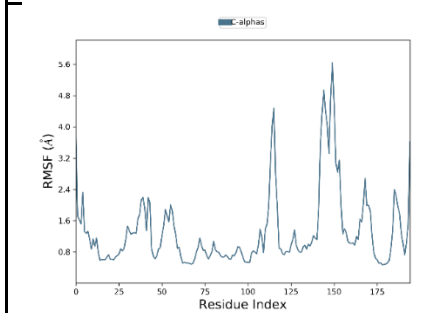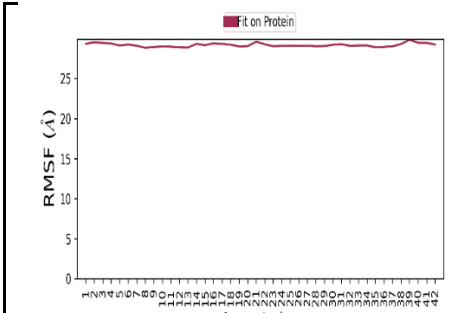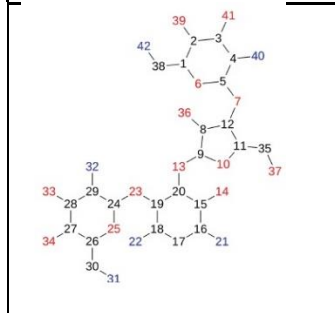

DB00569

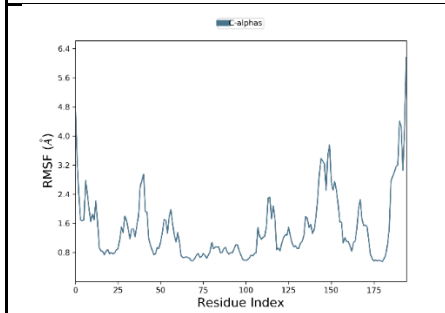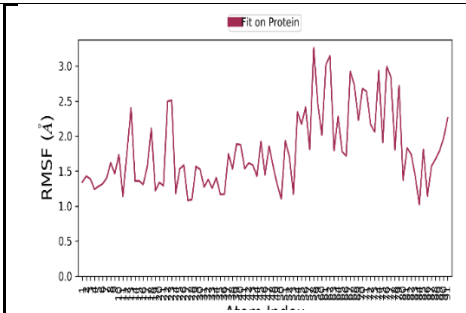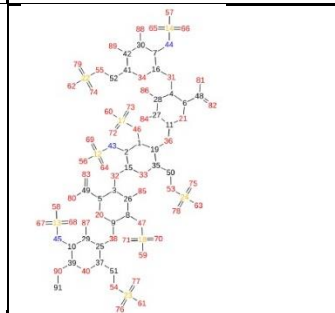

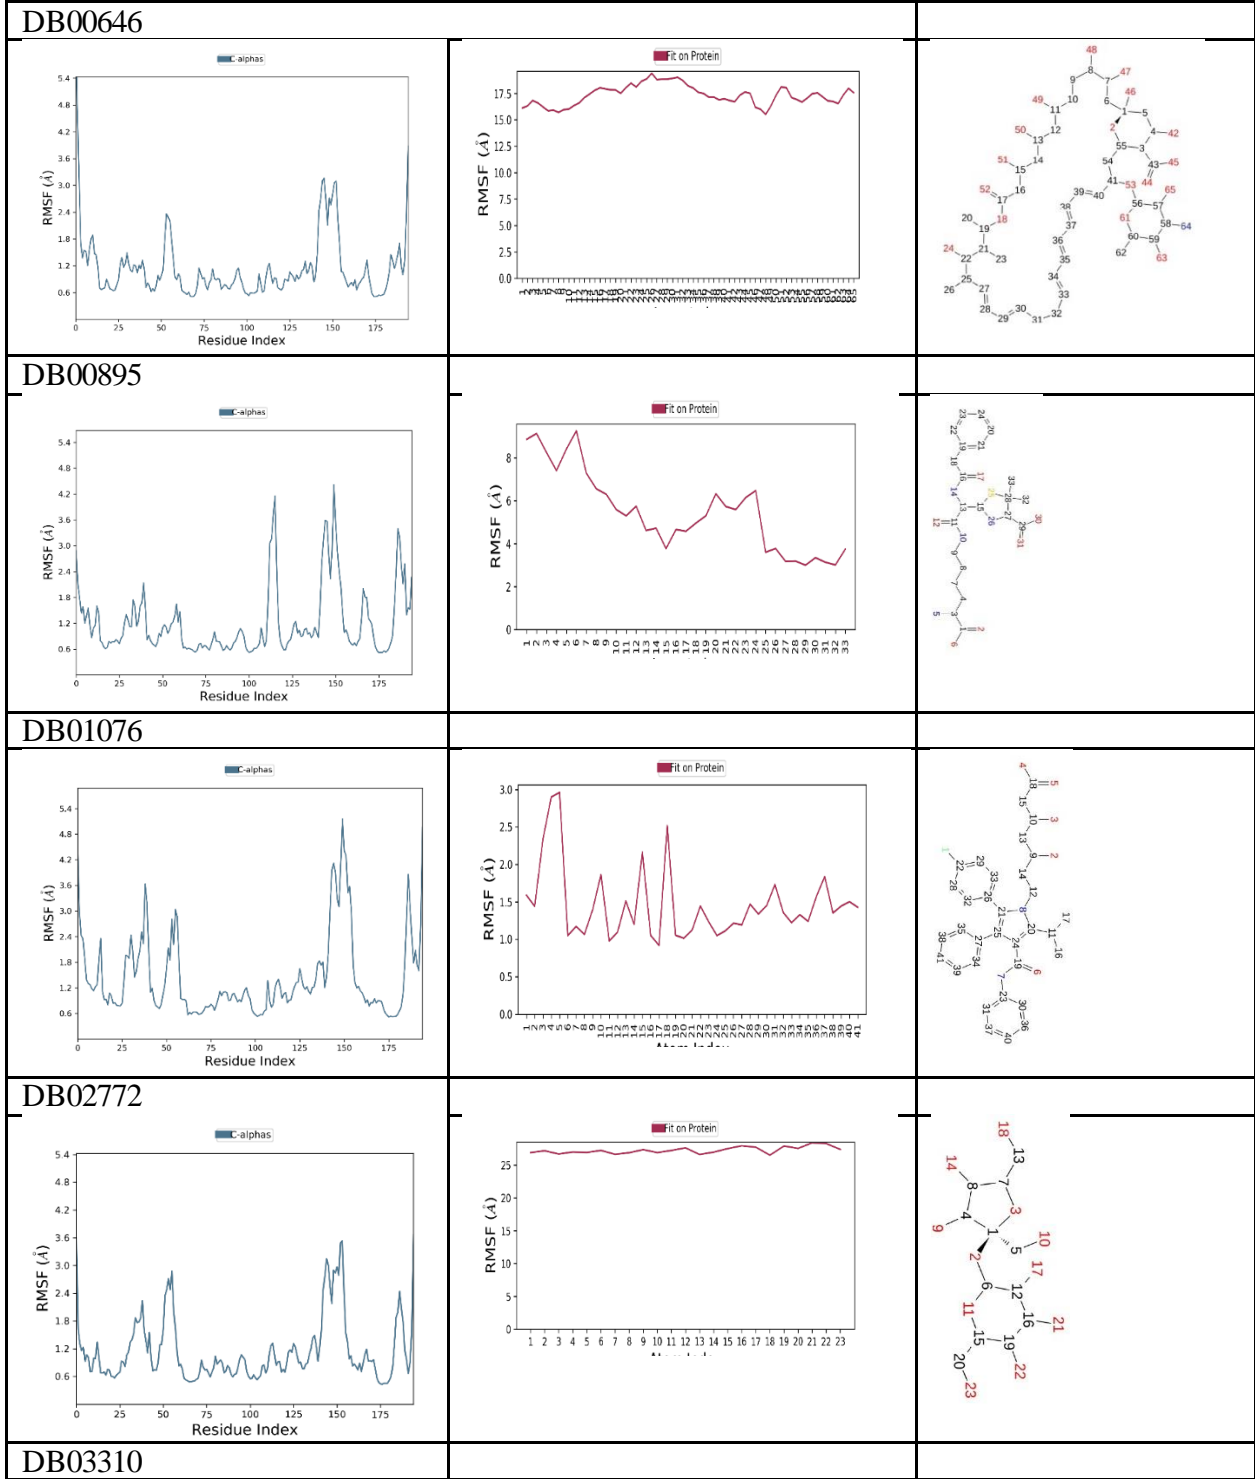

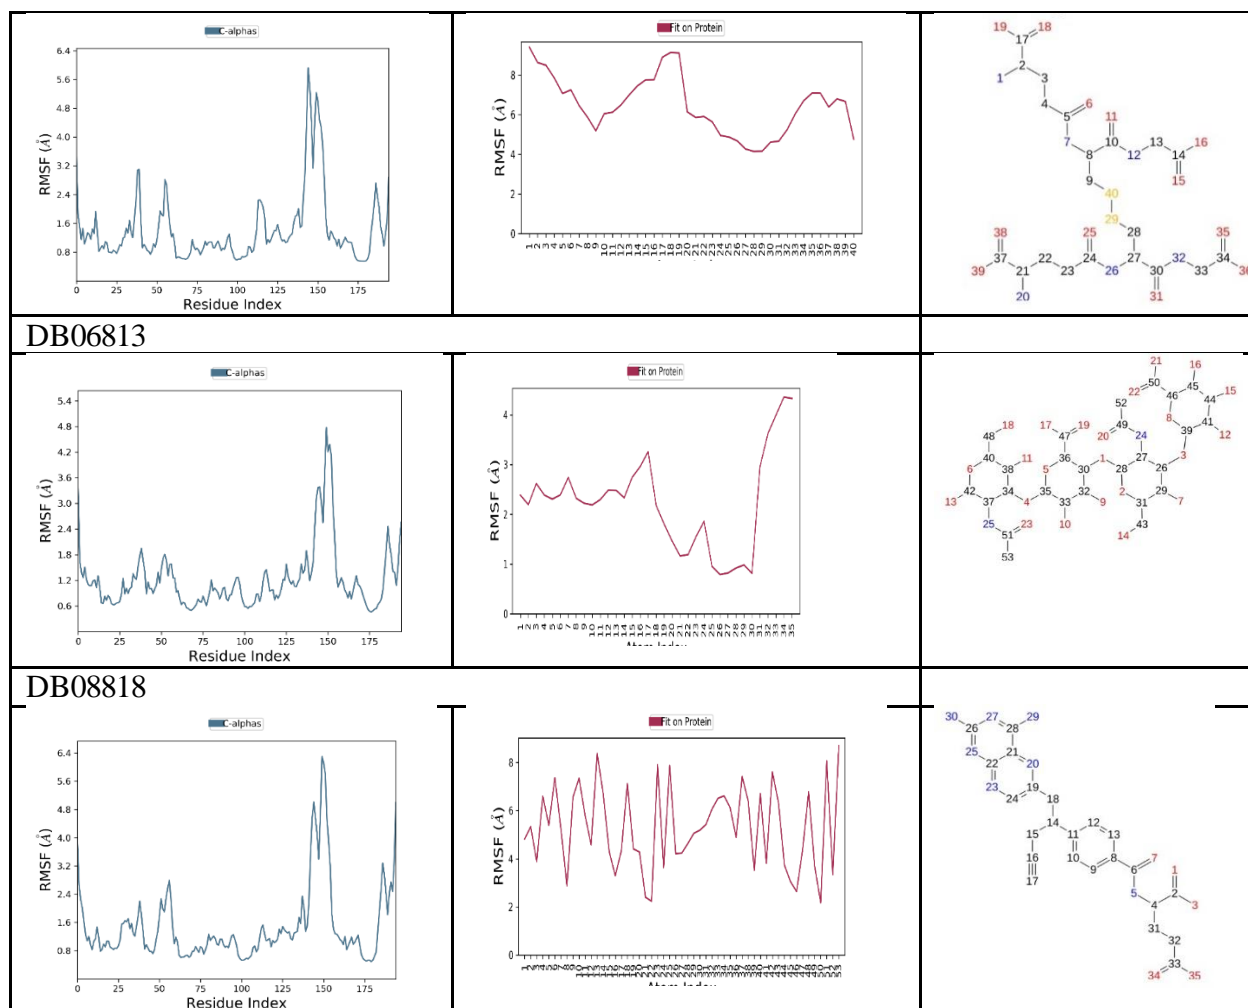

**Figure S2:** RMSF of SARS-CoV-2 RBD (first column) and drugs (second column) in 20 RBD-Drug complexes. 2D diagram of drugs are shown in third column.

DB08995

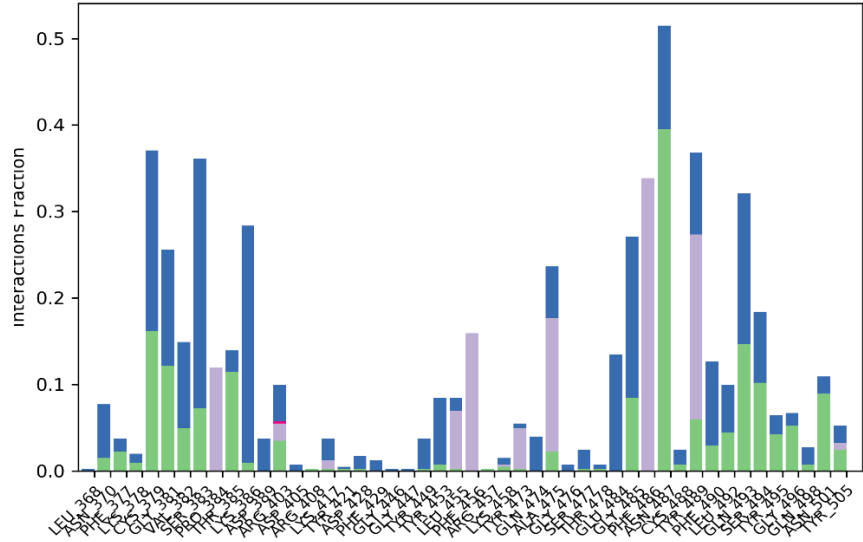

DB00284\_MM  
GBSA

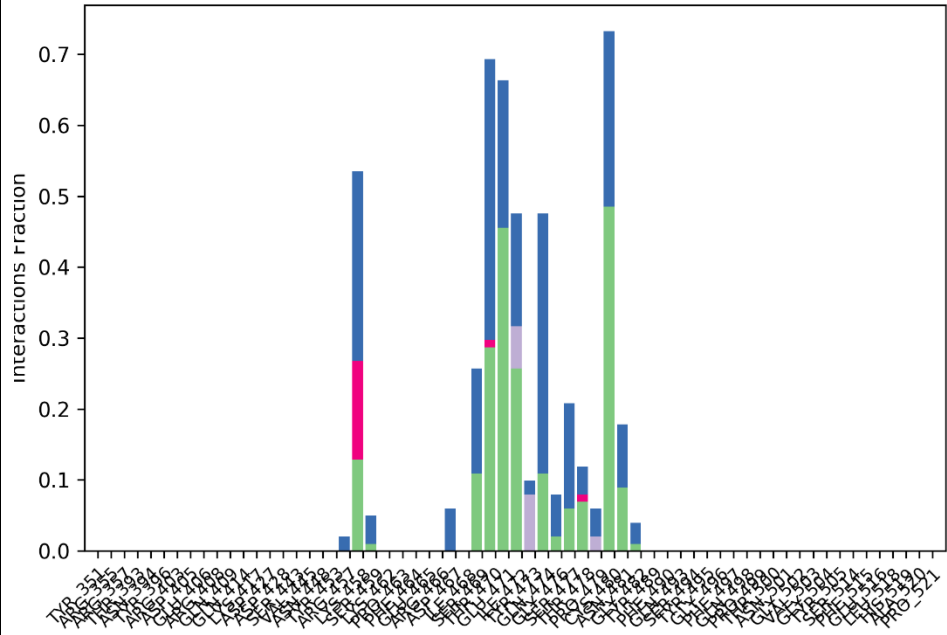



DB00284\_XP

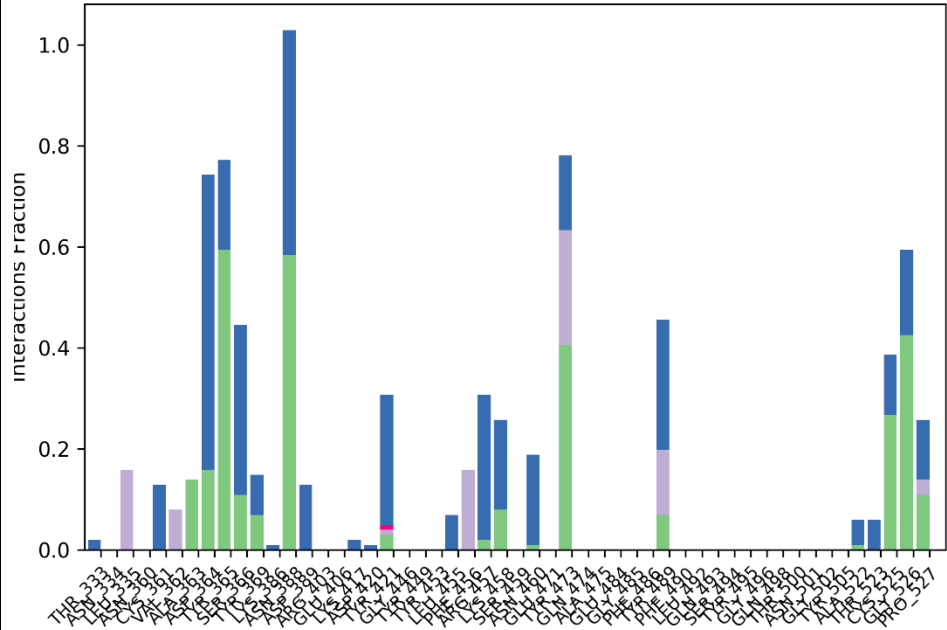

DB00644\_MM  
GBSA

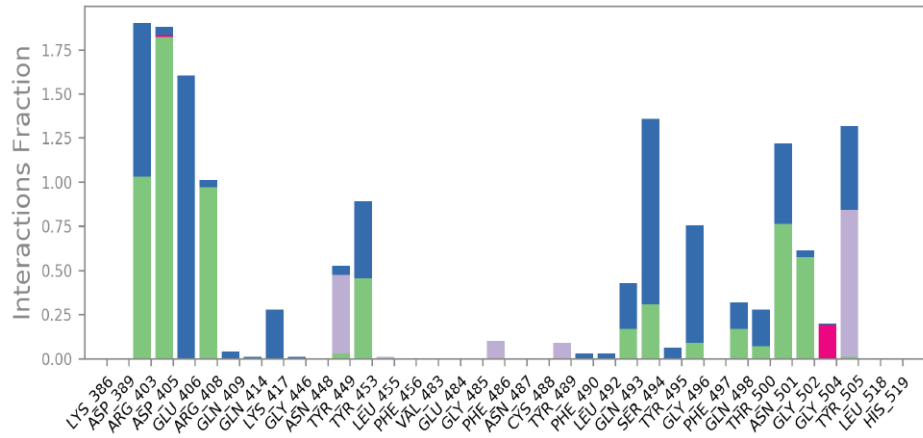

DB00644\_XP

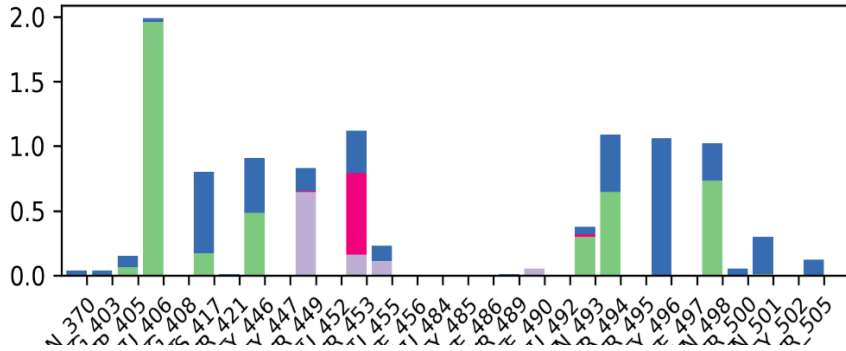

DB01698

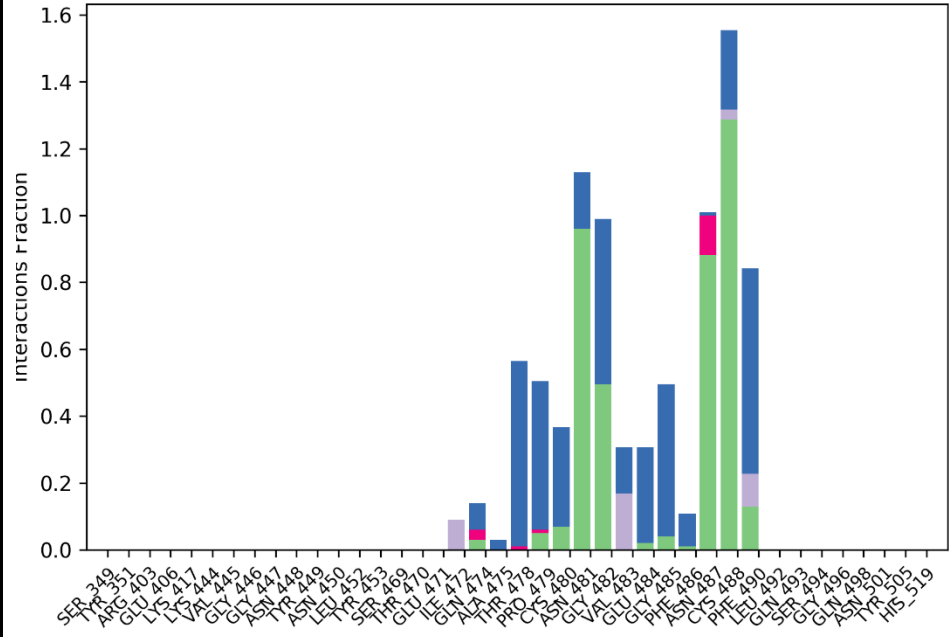

DB03147

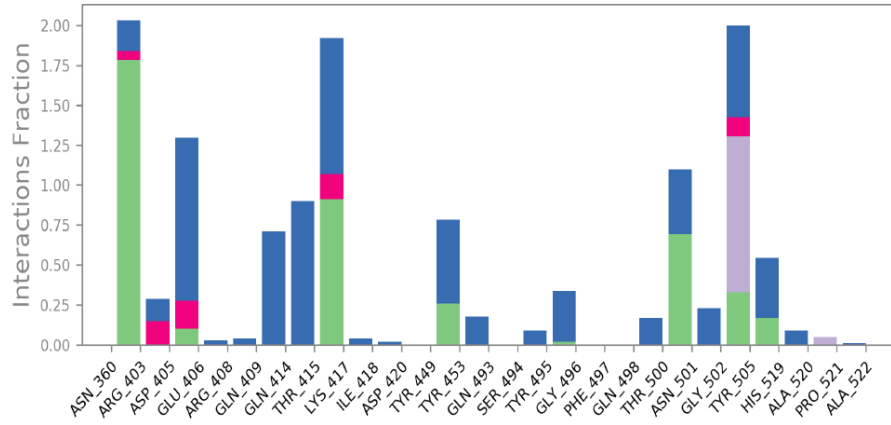

DB04703

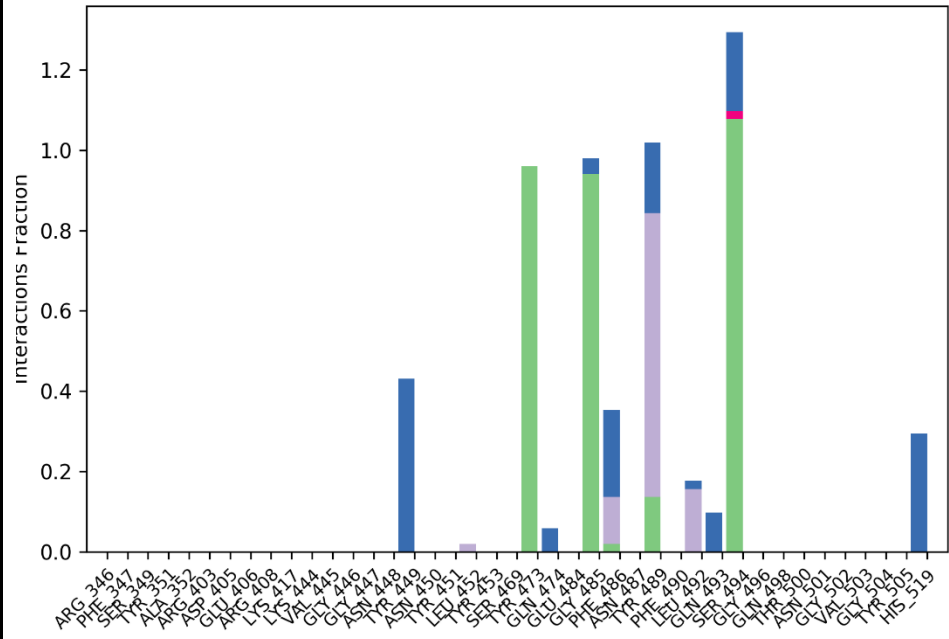

DB012942

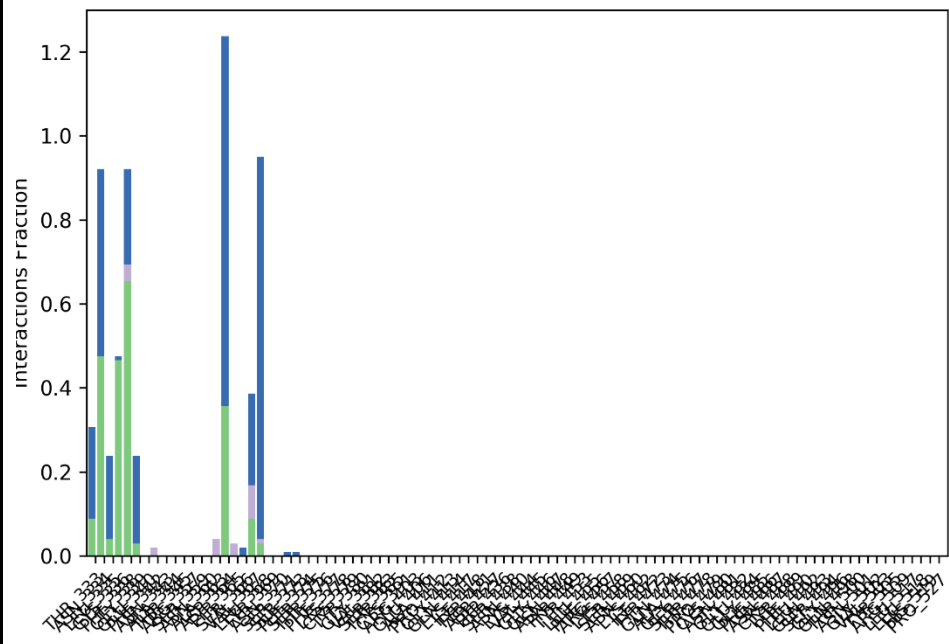

DB00157

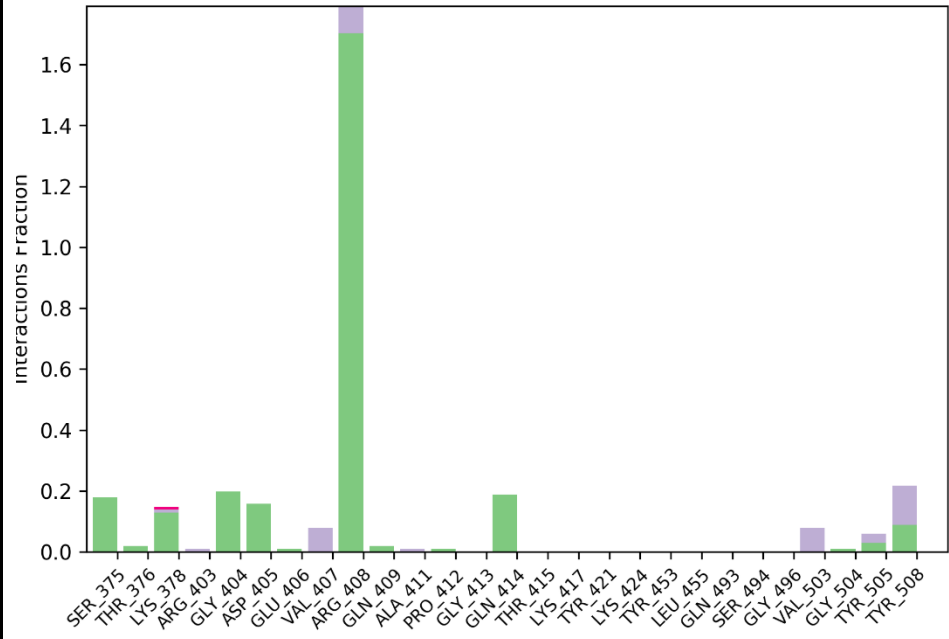

DB00441

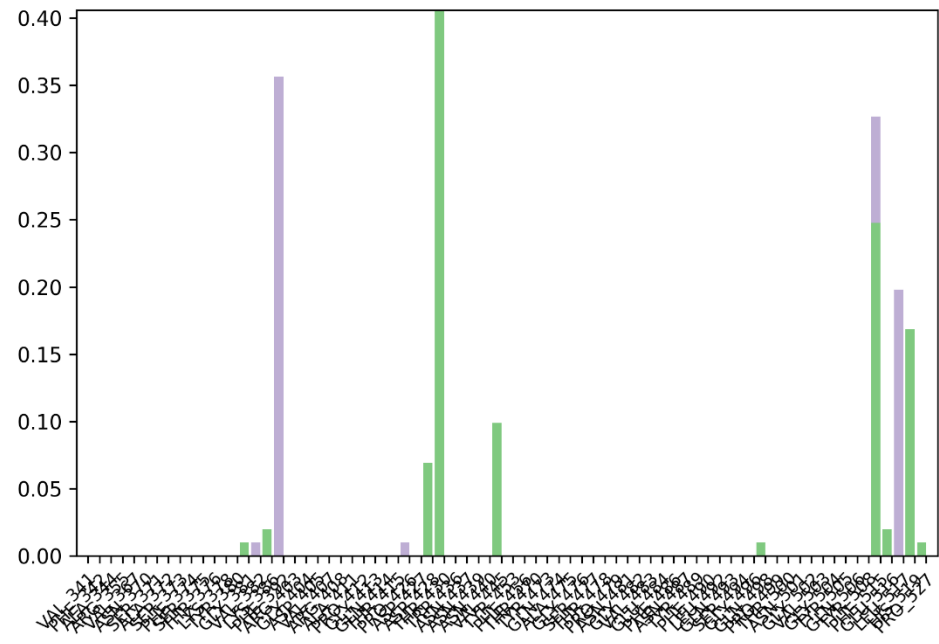

DB00452

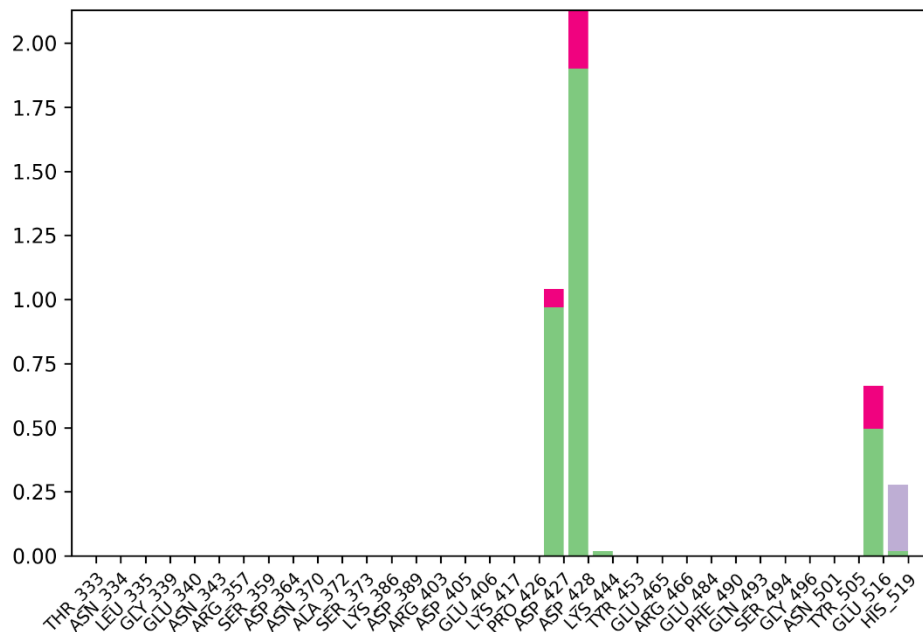

DB00569

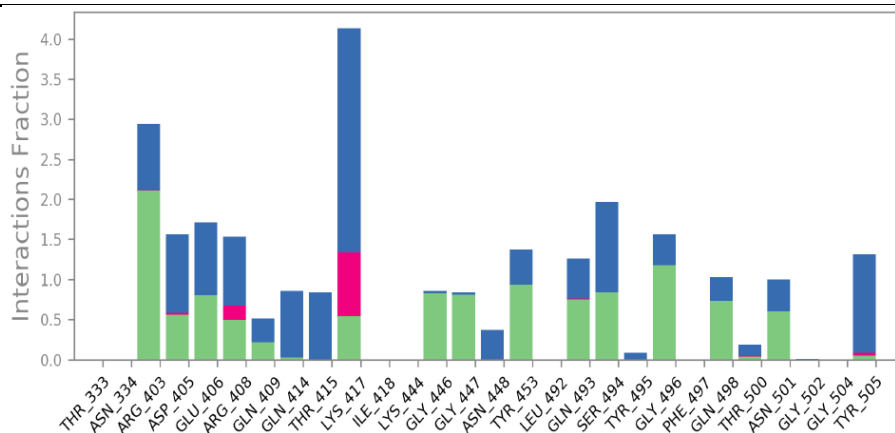

DB00646

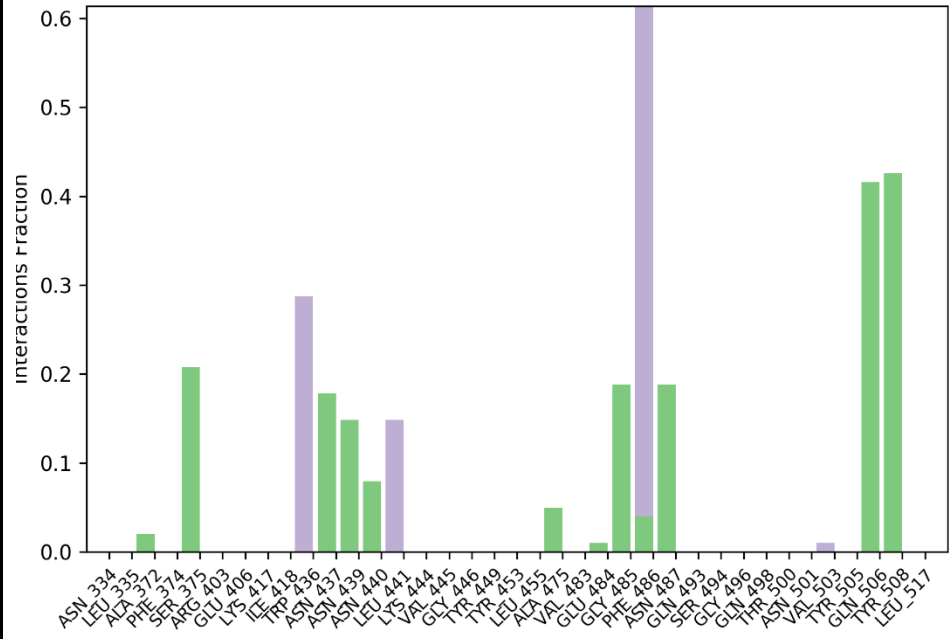

DB00895

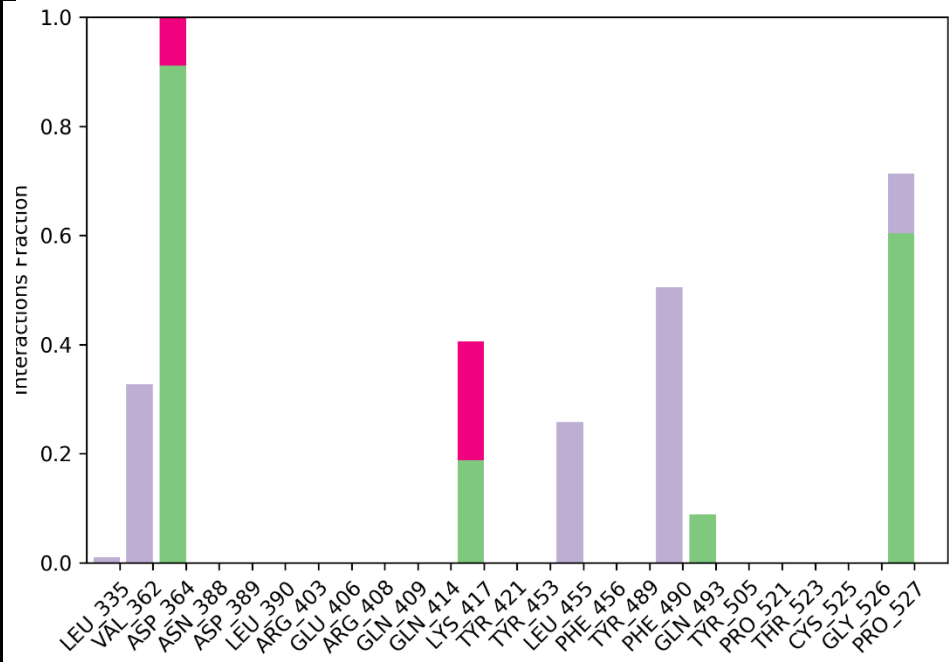

DB01076

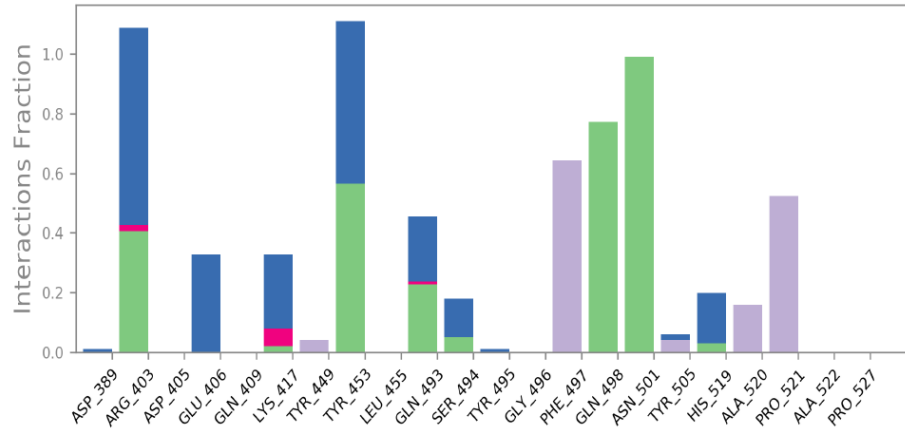

DB02772

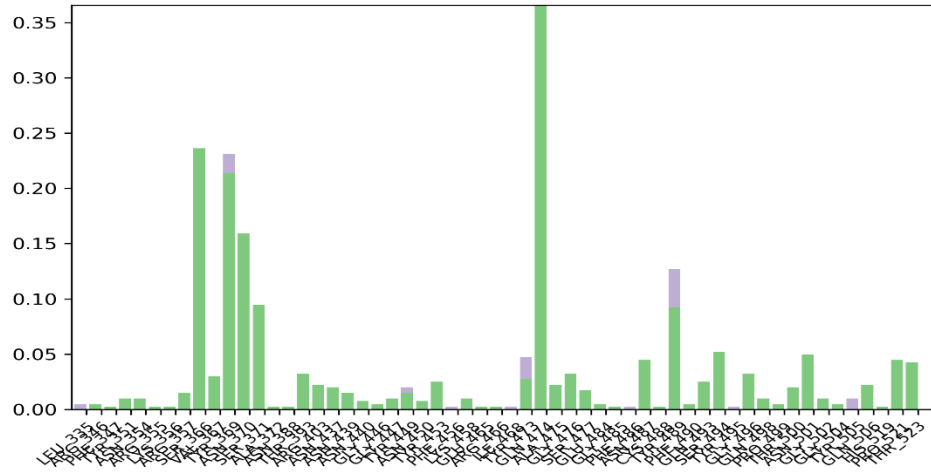

DB03310

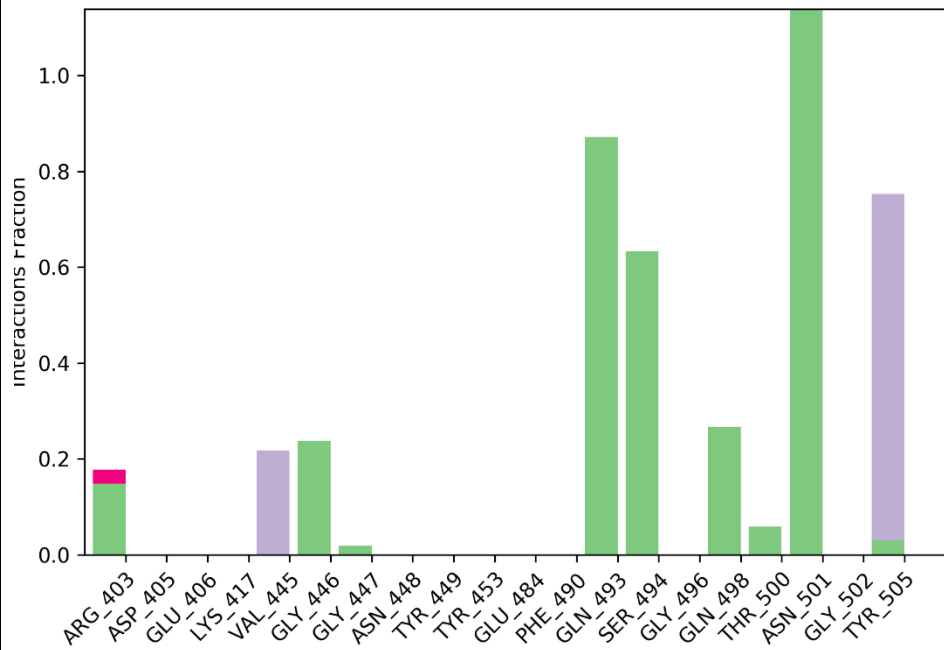

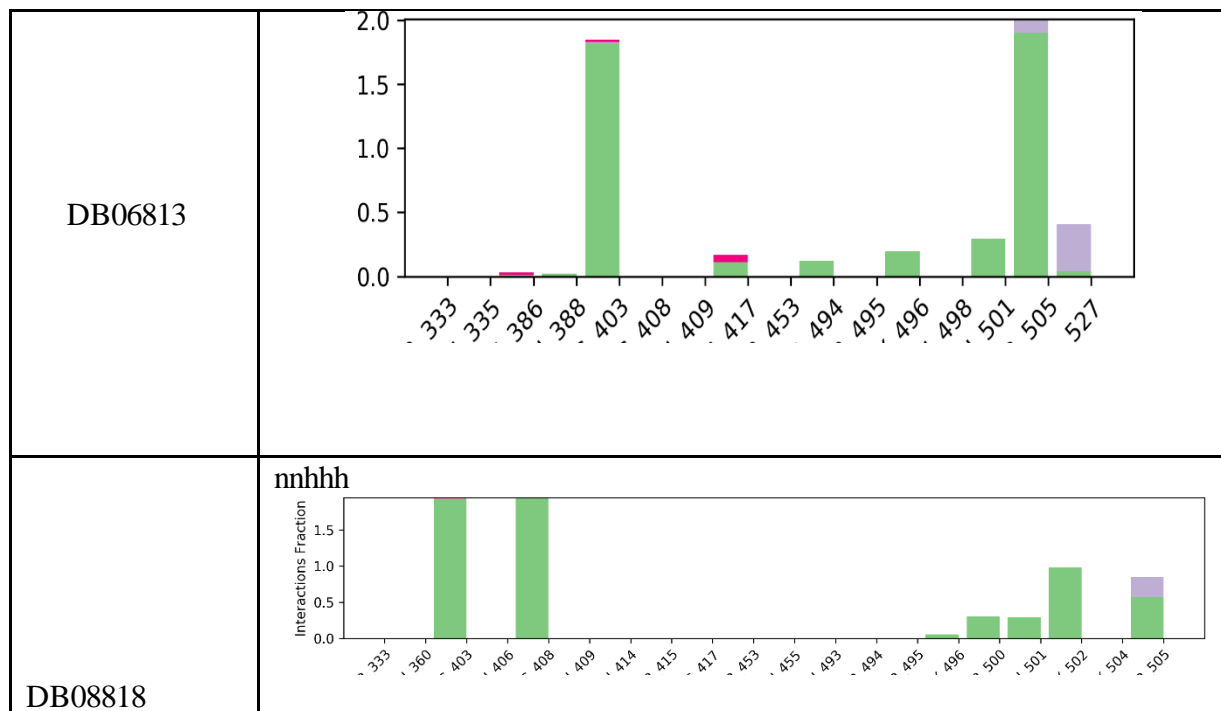

**Figure S3:** Histograms showing different types of interactions between drugs and spike RBD.



DB08995

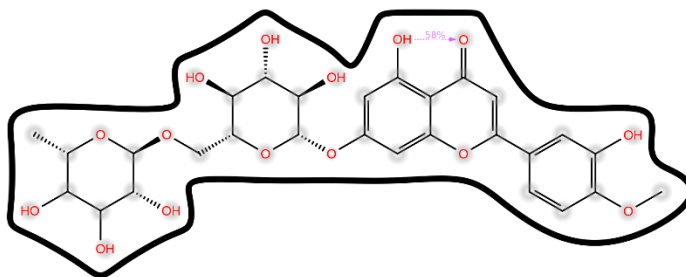

DB00284\_MM  
GBSA

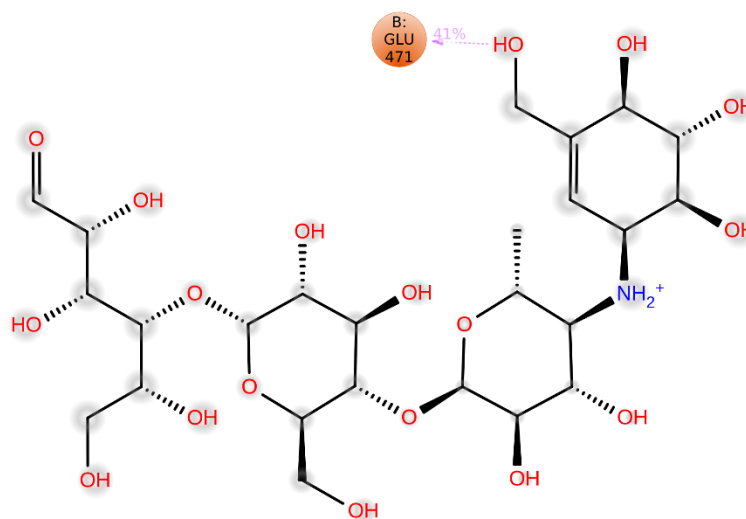

DB00284\_XP

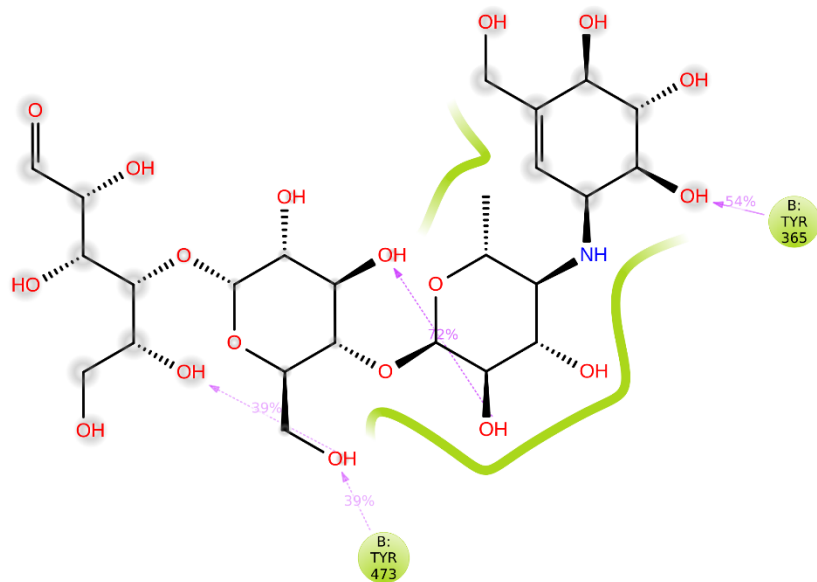

DB00644\_MM  
GBSA

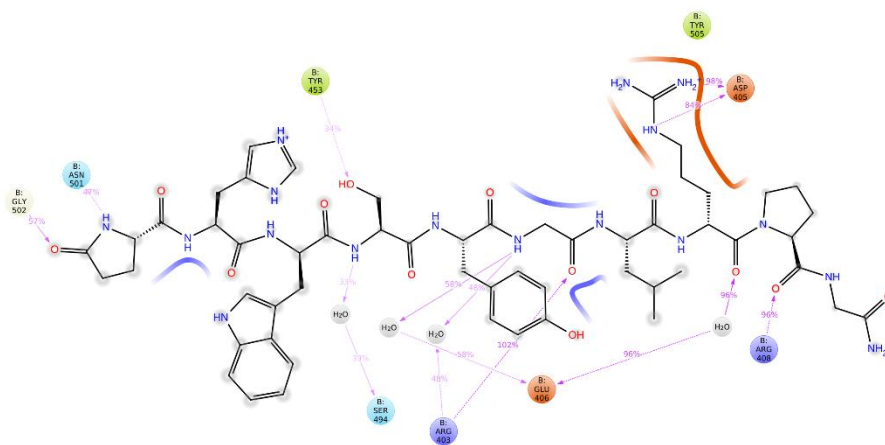

DB00644\_XP

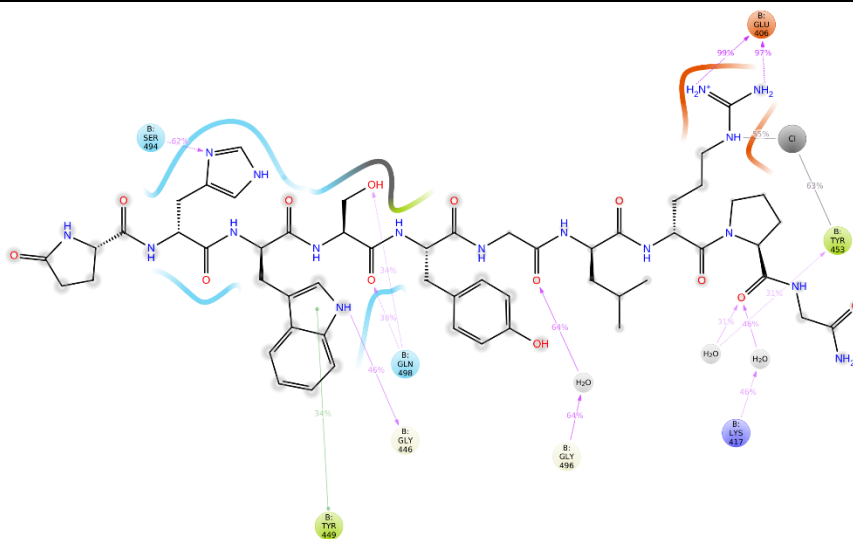

DB001698

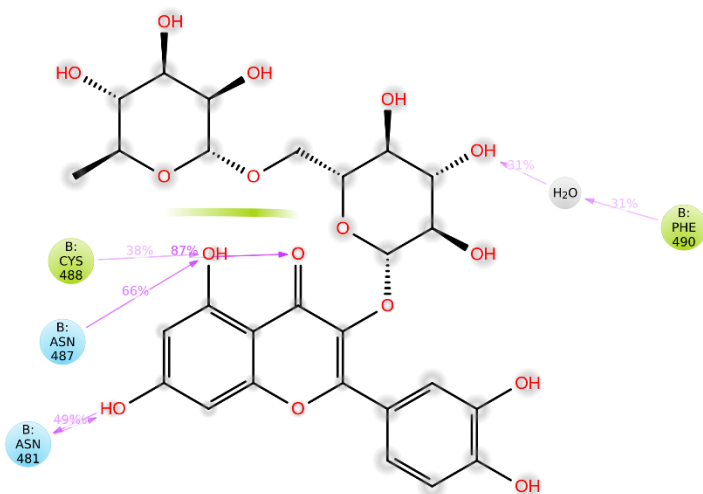

DB03147

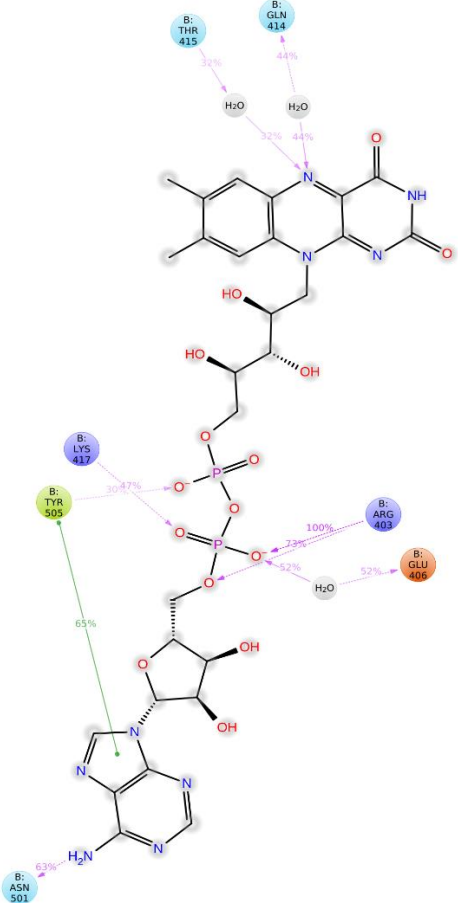

DB04703

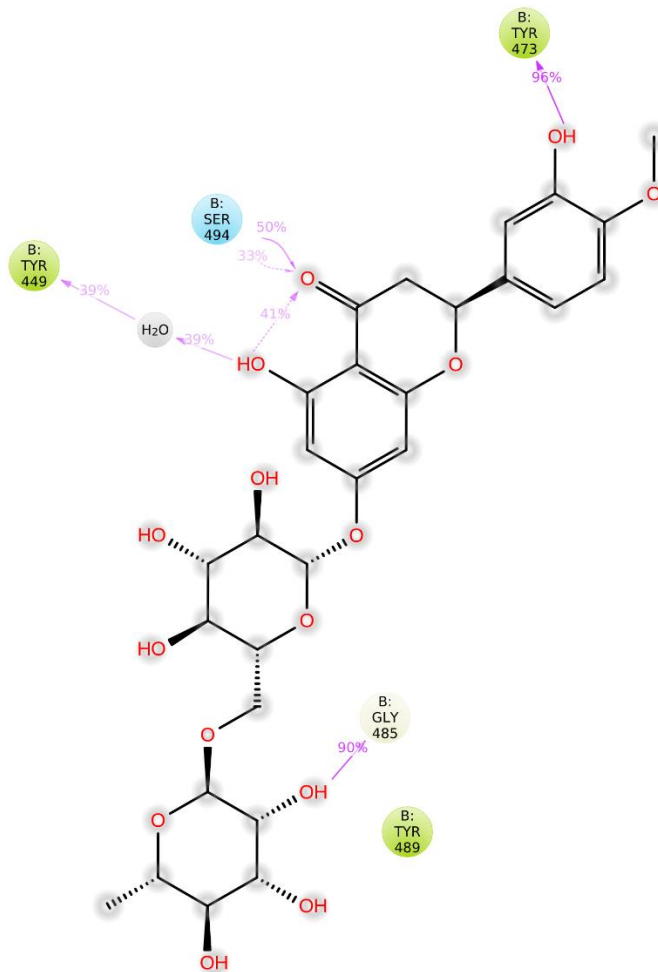

DB12492

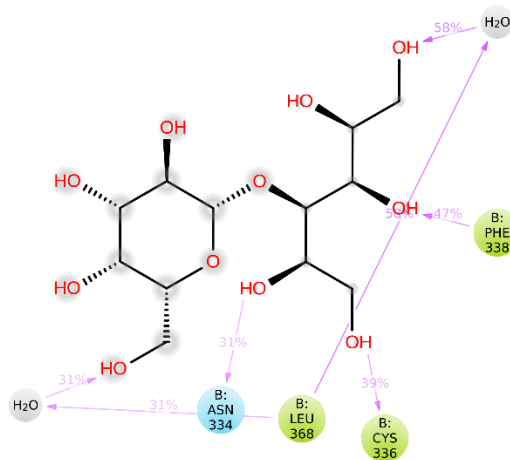

DB00157

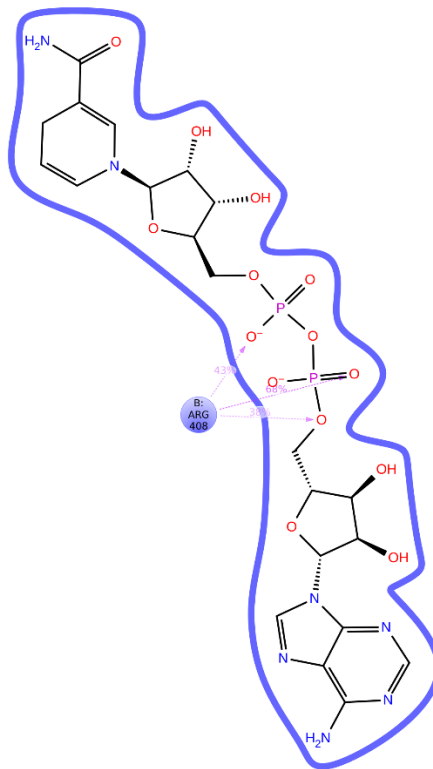

DB00441

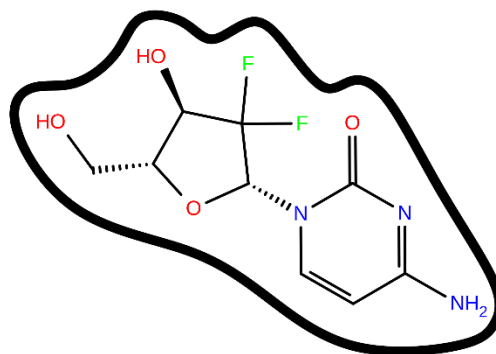

DB00452

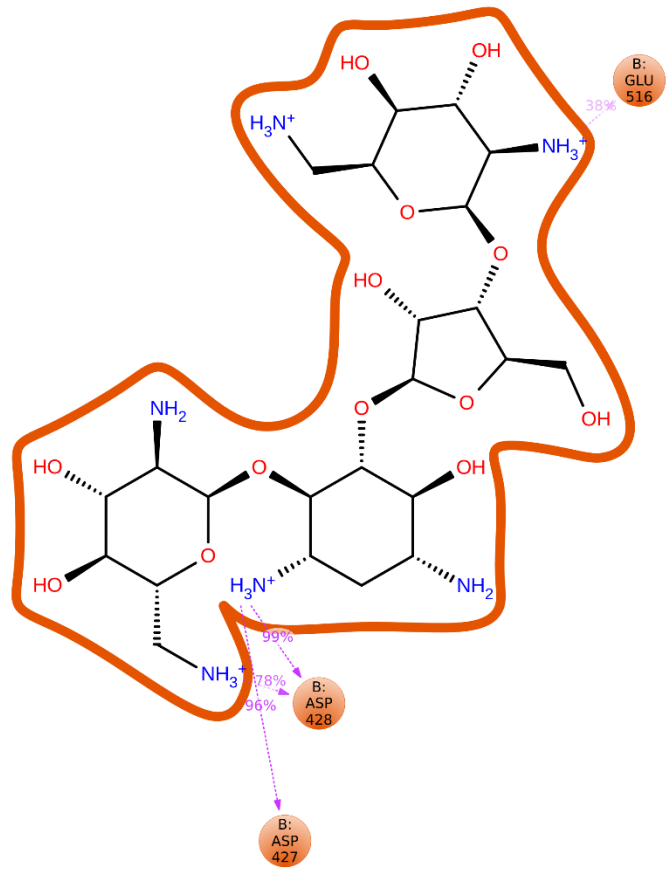

DB00569

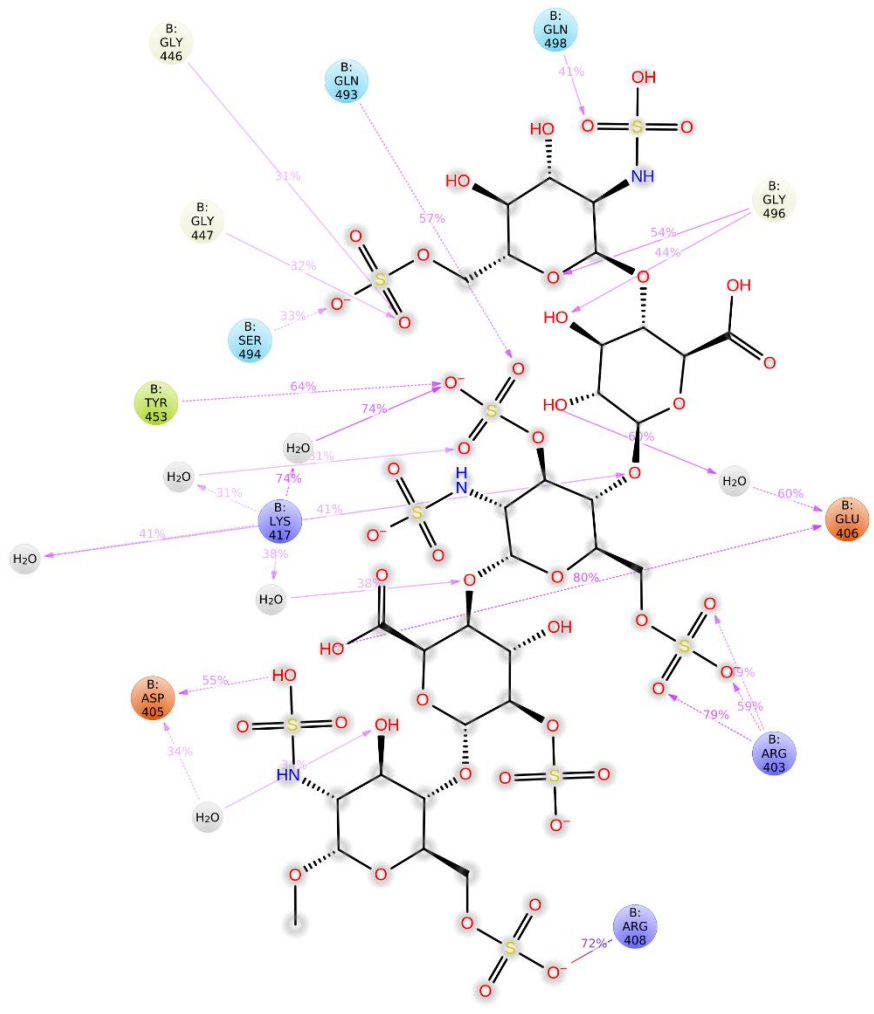



DB00646

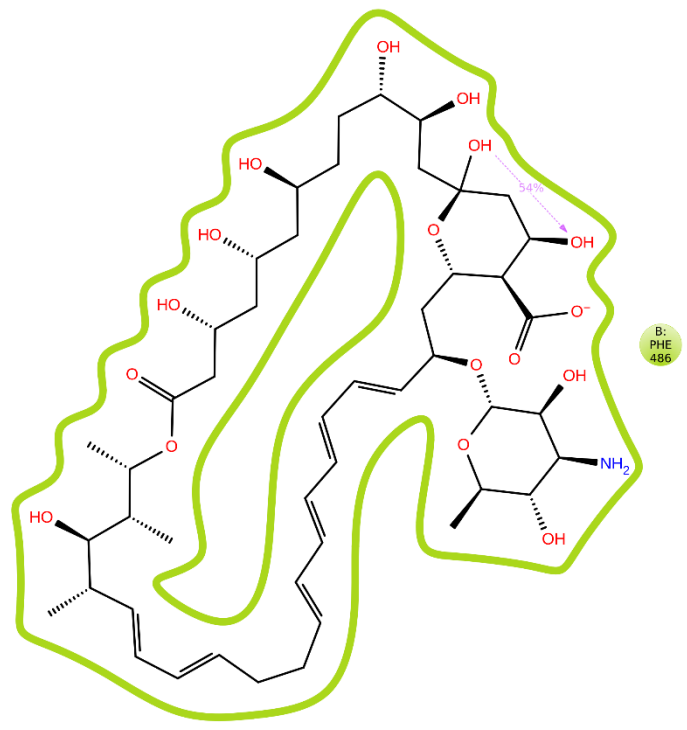

DB00895

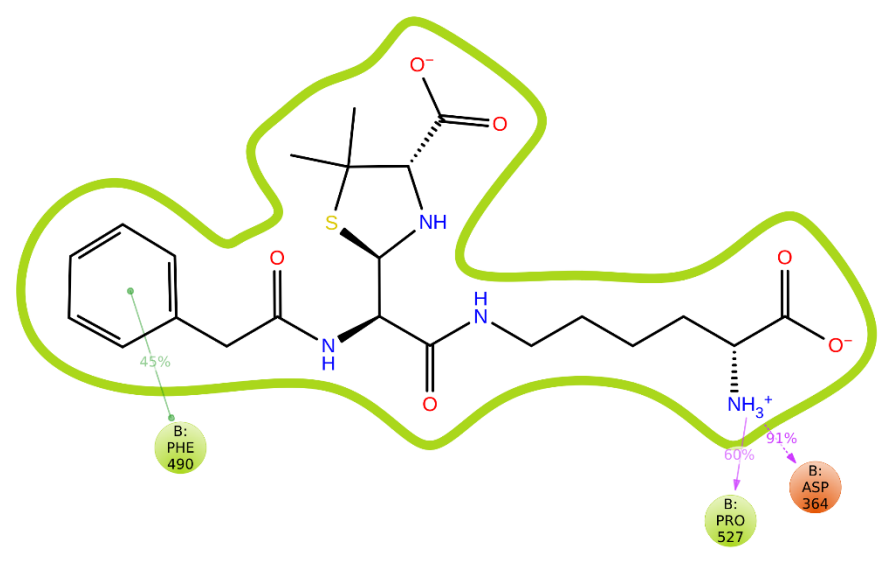

DB01076

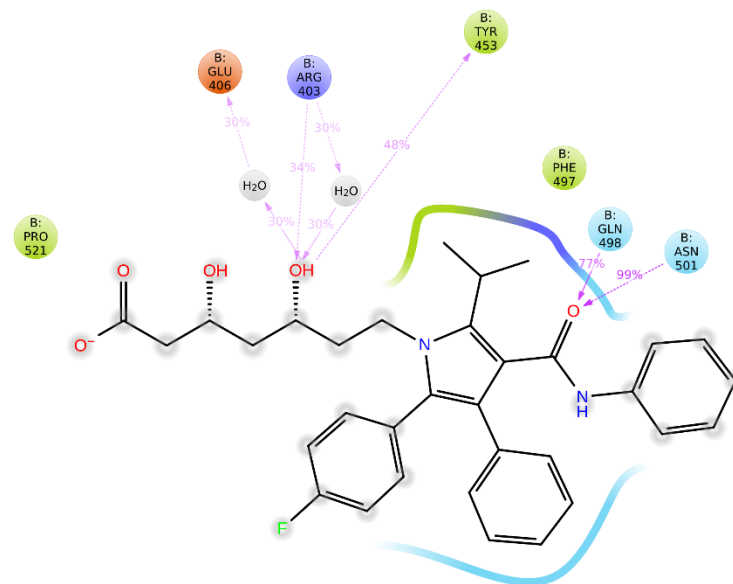

DB02772

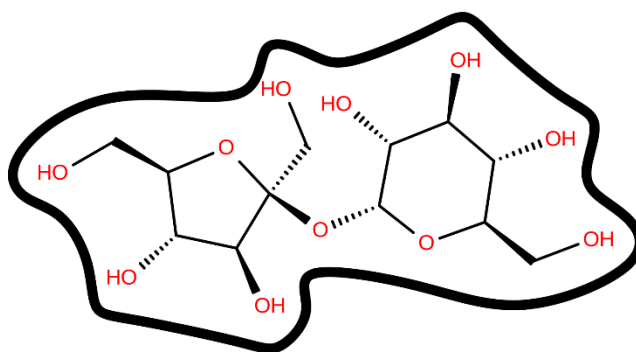

DB03310

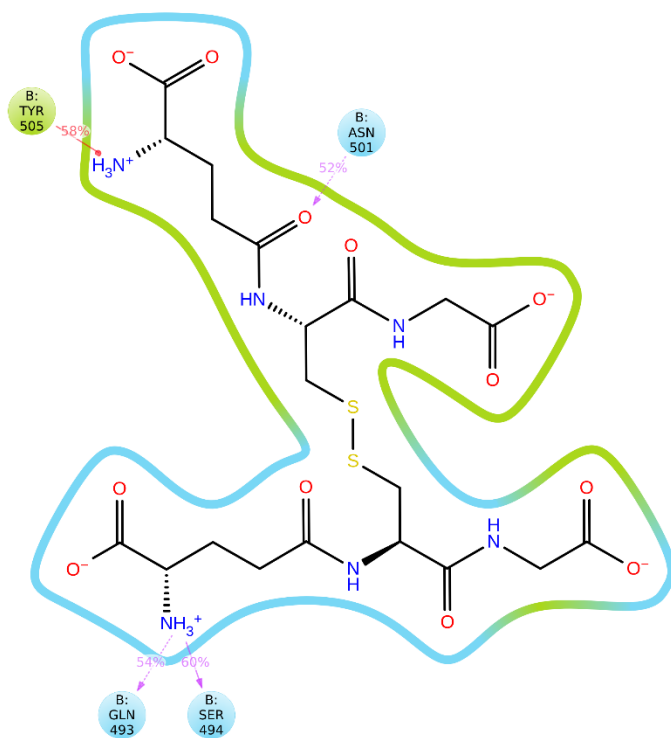

DB06813

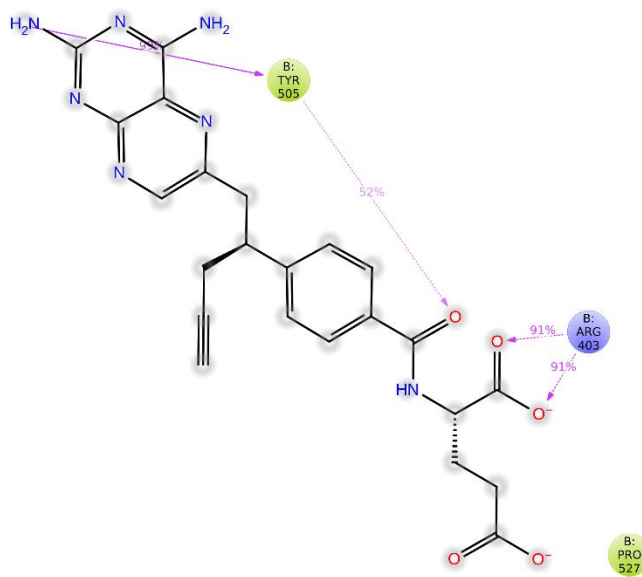

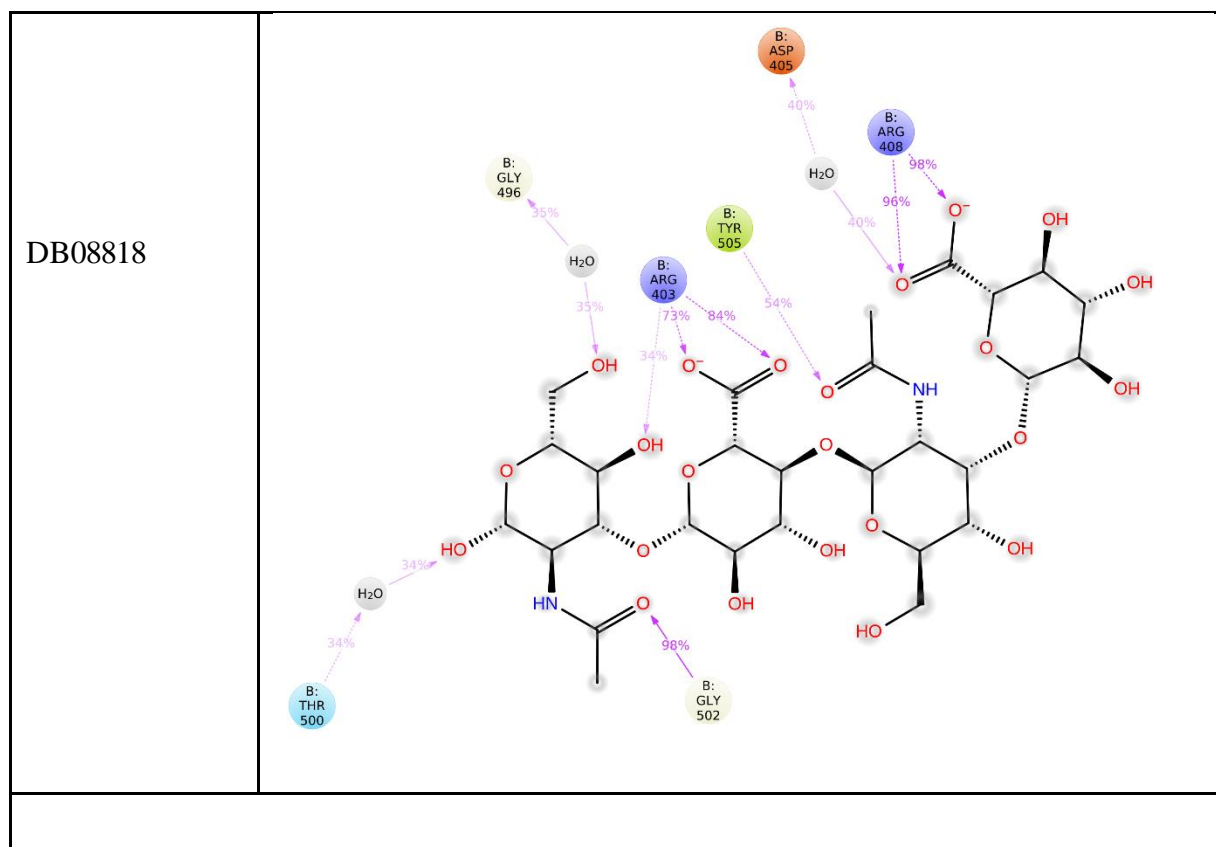

**Figure S4:** Interactions which occur more than 30 % of the simulation. Last 50 ns of the trajectories was considered for the generation of images.

|              |  |
|--------------|--|
| DB08995      |  |
| DB00284_GBSA |  |
| DB00284_XP   |  |
| DB00644_GBSA |  |
| DB00644_XP   |  |

|         |  |
|---------|--|
| DB01698 |  |
| DB03147 |  |
| DB04703 |  |
| DB12942 |  |
| DB00157 |  |
| DB00441 |  |
| DB00452 |  |
| DB00569 |  |

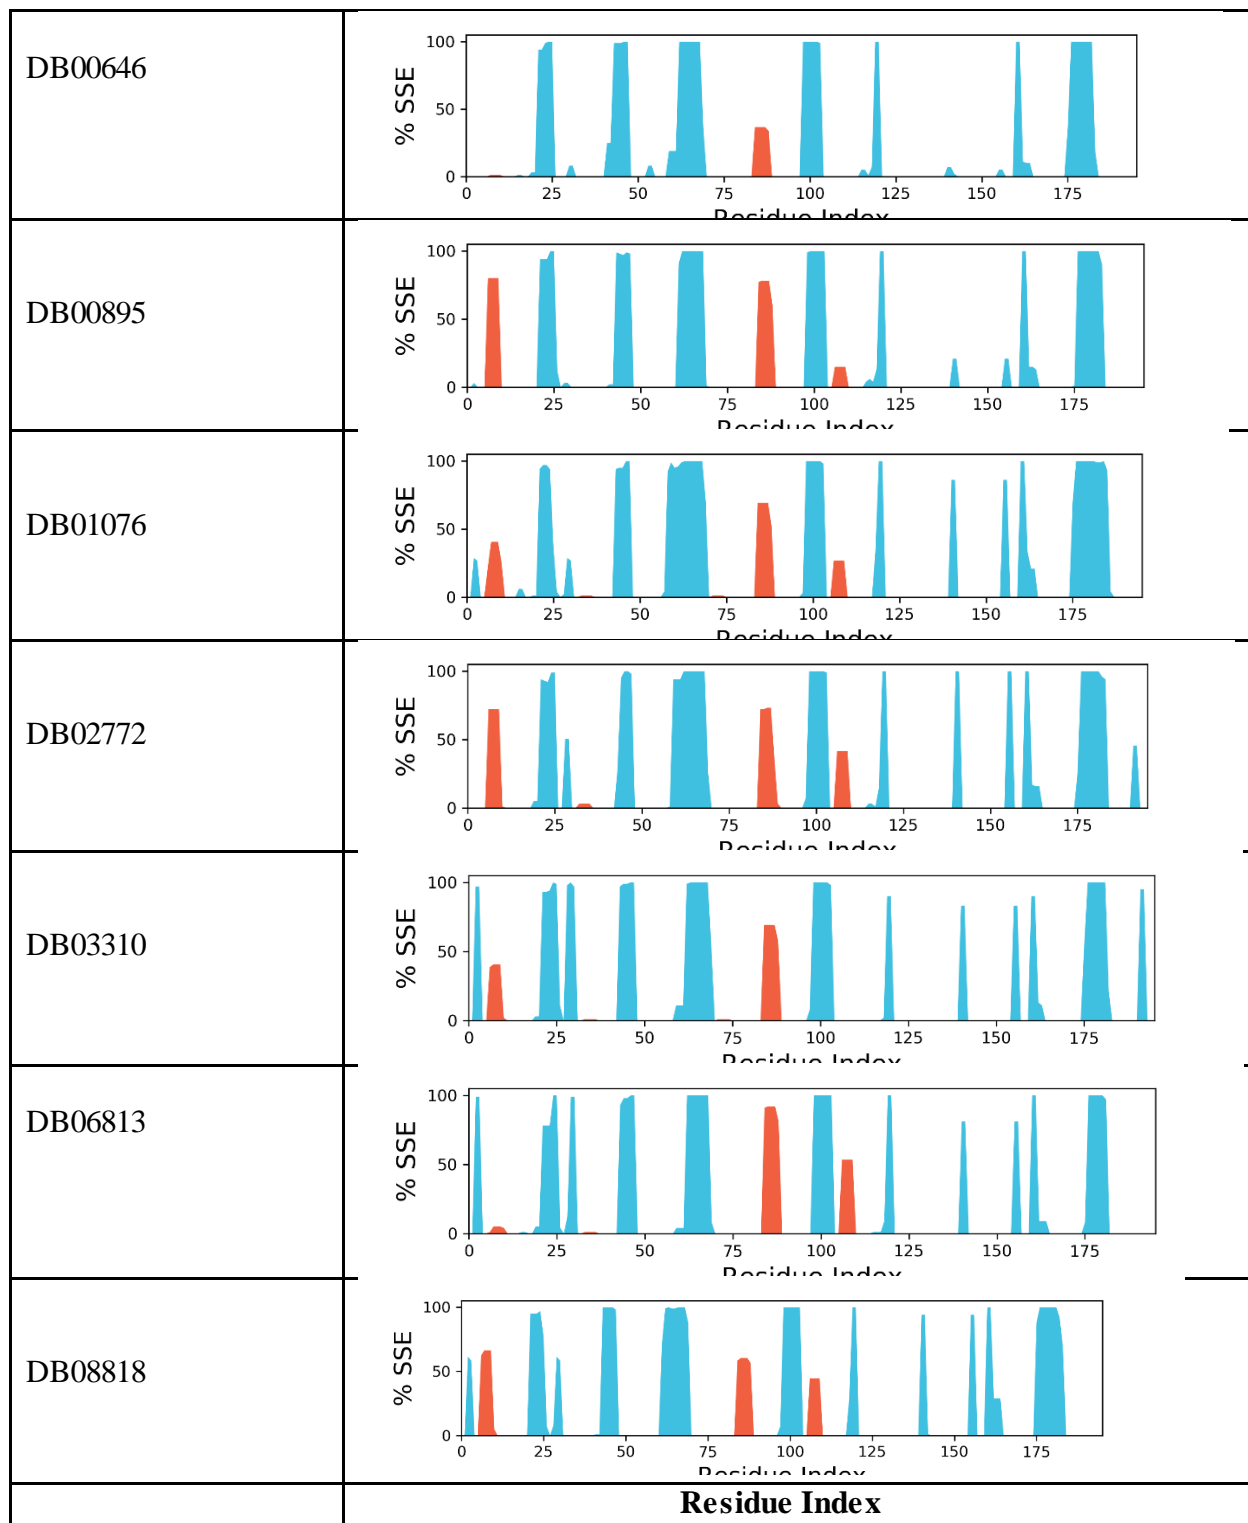

**Figure S5:** SSE of RBD during last 50 ns of trajectories.

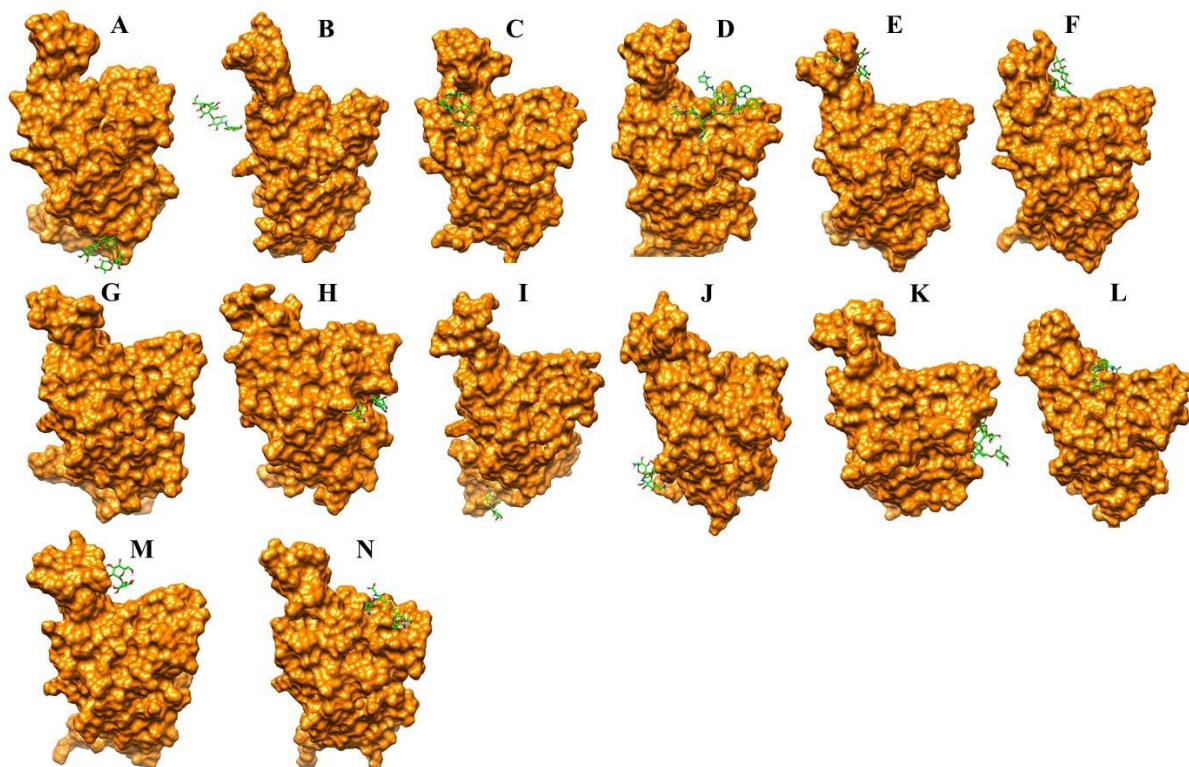

**Figure S6:** Drugs which show high RMSD from the initial docked conformations. (A) DB08995 (B) DB00284\_MMGBSA (C) DB00284\_XP (D) DB00644\_XP (E) DB01698 (F) DB04703 (G) DB12942 (H) DB00157 (I) DB00441 (J) DB00452 (K) DB00646 (L) DB00895 (M) DB02772 and (N) DB03310. RBD is shown in surface representation (Orange) and bound drugs are shown in stick representation (Green). Last frames of drug-RBD complexes were used to generate the images. Note: DB00644\_XP also showed RMSD less than 10 Å but other pose (DB00644\_MMGBSA) has been mentioned in main text. DB00644\_MMGBSA showed lower RMSD than DB00644\_XP.
